1 ***In silico* EsxG·EsxH Rational Epitope Selection: Candidate Epitopes for Vaccine**

2 **Design against Pulmonary Tuberculosis**

3

4 **Constanza Estefania Martínez-Olivares<sup>1</sup>, Rogelio Hernández-Pando<sup>1\*</sup>, Edgar**

5 **Mixcoha<sup>2\*</sup>**

6

7 <sup>1</sup>Experimental Pathology Laboratory, Instituto Nacional de Ciencias Médicas y Nutrición

8 “Salvador Zubirán”, Experimental Pathology Department, Mexico City, Mexico

9 <sup>2</sup>Addiction Immunology Laboratory, Instituto Nacional de Psiquiatría “Ramón de la Fuente

10 Muñiz” - CONACyT, Mexico City, Mexico

11

12 **\* Corresponding author**

13 E-mail: [emixcohahe@conacyt.mx](mailto:emixcohahe@conacyt.mx) (EM)

14 E-mail: [rhdezpando@hotmail.com](mailto:rhdezpando@hotmail.com) (RHP)

15

16 **Keywords: pulmonary tuberculosis; EsxG·EsxH; vaccine; humoral response;**

17 **Molecular Dynamics simulations; epitope**

18

## 1 **Abstract**

2

3 Rational design of new vaccines against pulmonary tuberculosis is imperative. EsxG·EsxH  
4 complex is involved in metal uptake, drug resistance, and immune response evasion. These  
5 characteristics make it an ideal target for rational vaccine development. The aim of this study  
6 is to show the rational design of epitope-based peptide vaccines by using bioinformatics and  
7 structural vaccinology tools. A total of 4.15  $\mu$ s of Molecular Dynamics simulations were  
8 carried out to describe the behavior in solution of heterodimer, single epitopes, and epitopes  
9 loaded into MHC-II complexes. In order to predict T and B cell epitopes for antigenic  
10 activation, bioinformatic tools were used. Hence, we propose three epitopes with the potential  
11 to design pulmonary tuberculosis vaccines. The possible use of the proposed epitopes  
12 includes subunit vaccines, as a booster in BCG vaccination to improve its immune response,  
13 as well as the generation of antibodies that interfere with the mycobacterium tuberculosis  
14 homeostasis, affecting its survival.

15

## 16 **Introduction**

17

18 Tuberculosis (TB) is the leading bacterial cause of death in the world. Mycobacterium  
19 tuberculosis (Mtb), the pathogen responsible for the infection, spreads by air route into  
20 droplets or aerosol sprays from sick people, affecting mainly the lungs (pulmonary TB). With  
21 the COVID-19 pandemic, the number of TB deaths increased by 5.6%, reversing the existing  
22 progress in reducing mortality (1). Mycobacterium bovis bacille Calmette-Guérin (BCG) is

23 the only available vaccine against TB. BCG vaccine was developed 100 years ago, it shows  
24 efficient protection against miliary and meningeal TB, but its protection against pulmonary  
25 TB ranges from 0 to 80 % (2).

26

27 Vaccination is one of the most successful public health initiatives to prevent  
28 infectious diseases (3). For TB disease, the development of new vaccines is necessary to  
29 reduce its worldwide incidence; hence, a rational design of vaccines is imperative. Rational  
30 vaccine design makes use of bioinformatics tools and computational chemistry approaches  
31 to identify protein regions based on physicochemical and structural information to trigger a  
32 protective immune response. The main advantage of these tools is the reduction of  
33 development in time and cost (3,4).

34

35 One of the vaccine approaches is the use of epitope vaccines (5). Epitope-based  
36 vaccines are considered safe because they exclude allergens, toxins, or functional domains  
37 of the pathogen. Therefore, the involved immune response is restricted to defined antigenic  
38 regions (3). A disadvantage of subunit vaccines constituted by epitopes is the duration of the  
39 evoked immune memory due to their small size, short half-life, limited activity on immune  
40 cells stimulation, and their limited immune memory. Although BCG is an attenuated vaccine,  
41 it shows a relatively limited immune memory, but it is possible to extend it by using subunit  
42 vaccines as boosters after BCG vaccination. Vaccination is also necessary to stimulate crucial  
43 immune targets from innate immunity, as well as acquired or adaptive cellular and humoral  
44 immunity. BCG is efficient to stimulate innate immunity, being macrophage activation and  
45 training immunity a clear example (6). BCG stimulates adaptive cellular immunity, but it  
46 seems that it induces a limited activation of humoral immunity. Antibodies also contribute to

47 the protection against Mtb, being essentially mediated by bacterial opsonization, and  
48 improving its intracellular killing (7). B lymphocytes can produce bactericidal antibodies but  
49 it has not been demonstrated for TB yet. However, it is quite possible that antibodies could  
50 neutralize or interfere with significant bacterial proteins related to essential metabolic  
51 processes that could be bactericidal antibodies.

52

53 The selection of an optimal antigen is a critical step in rational vaccine design (3).  
54 EsxG and EsxH proteins from Mtb were selected for this work. Mainly, EsxG·EsxH complex  
55 belongs to the ESX-3 secretion system, which is essential for bacteria viability, and it is  
56 metabolically important due to its role in iron uptake and in the adaptation to a low zinc  
57 environment (metal homeostasis) (8–11). EsxG and EsxH proteins are secreted by the ESX-  
58 3 secretory system as a heterodimer. EsxG·EsxH heterodimer not only has significant activity  
59 in the bacterial metabolism, but it also has a remarkable immunological activity response to  
60 TB (12,13). Phagolysosome formation is a basic mechanism for bacterial elimination in  
61 phagocytic cells and is efficiently blocked by Mtb, after interacting with the host endosomal  
62 sorting complex (ESCRT) that prevents lysosome fusion. The ESCRT complex classifies the  
63 ubiquitin-labeled surface receptors to be degraded in the lysosome and loads peptides derived  
64 from the pathogens into MHC class II molecules. The EsxG·EsxH complex inhibits  
65 phagosome maturation by binding Hrs protein and delaying T cell activation during infection.  
66 Therefore, it is important to identify mechanisms that promote a rapid and robust activation  
67 of protective T cells (14–17). Furthermore, the genes that encode EsxG and EsxH proteins  
68 have been associated with Mtb first-line drug resistance mechanisms (18). These  
69 characteristics make EsxG and EsxH proteins an ideal target for rational vaccine  
70 development.

71           The structure of the EsxG·EsxH complex has been solved by Nuclear Magnetic  
72 Resonance. The heterodimer folds into a helix-turn-helix-turn structure of each monomer,  
73 which are arranged antiparallel to each other, forming a complex of four helices according to  
74 Protein Data Bank (PDB: 2KG7). These helices are defined as follows. EsxG: residue 16 to  
75 40 forms helix g1a, residue 41 to 42 forms helix g1b, and residue 48 to 77 forms helix g2.  
76 EsxH: residue 18 to 40 forms helix h1a, residue 41 to 44 forms helix h1b, residues 61 to 72  
77 forms helix h2a, and residues 75 to 81 forms helix h2b. The putative Zn<sup>2+</sup> binding site has  
78 been identified in H14, H70, and H76 residues of EsxH protein, and the side chain of E77 is  
79 hypothesized to form the fourth Zn<sup>2+</sup> coordination group (19). The EsxG·EsxH complex  
80 model under code 2KG7 lacks Zn<sup>2+</sup>; there are no other experimental coordinates of dimer  
81 that contain Zn<sup>2+</sup>.

82

83           The aim of this study is to show the rational design of epitope-based peptide vaccines  
84 by using bioinformatics and structural vaccinology tools. Three epitopes of the EsxG·EsxH  
85 complex were selected. A total of 4.15 μs of Molecular Dynamic simulations (MD) were  
86 used to describe the behavior of epitopes in solution or loaded into a MHC-II complex. B cell  
87 epitopes were predicted for humoral activation. Even knowing that Mtb is an intracellular  
88 pathogen, it must have entered from outside, so if the immune system has developed specific  
89 and avid antibodies against any of the TB proteins, it will be advantageous to inhibit the  
90 infection. Furthermore, if one of these proteins has demonstrated to be necessary for the  
91 survival of the bacteria, such as the EsxG·EsxH complex, then the antibodies generated by  
92 active immunization with a rationally designed conjugate vaccine could protect against TB  
93 infection. Hence, we propose three promising candidate epitopes for vaccine design against  
94 pulmonary TB.

## 95 **Methods**

96

### 97 **MHC class II binding epitope prediction**

98

99 Major histocompatibility complex (MHC) class II binding epitope prediction was  
100 carried out by the ProPred (<http://crdd.osdd.net/raghava/propred/>) (20) and the NetMHCII  
101 2.3 (<http://www.cbs.dtu.dk/services/NetMHCII/>) (21) servers. In order to locate binding  
102 regions with default parameters, 51 and 25 HLA-DR alleles were selected, respectively.

103

### 104 **B cell epitope prediction**

105

106 A Linear B cell epitope prediction from EsxG (UniProt ID: O53692) and EsxH  
107 (UniProt ID: P9WVK3) sequences were carried out by BepiPrep 2.0 server  
108 (<http://www.cbs.dtu.dk/services/BepiPred/>) (22), using a threshold of 0.46. The DiscoTope  
109 2.0 server was used for discontinuous B cell epitope prediction (23), with default parameters.  
110 The antigenic determinant prediction was performed by the IEDB analysis resource server  
111 (<http://tools.iedb.org/bcell/>) using the Kolaskar and Tongaonkar antigenicity scale (24), with  
112 default parameters.

113

### 114 **EsxG·EsxH Complex Molecular Dynamics simulation**

115

116           A quaternary structure formed by tuberculosis virulence factors EsxG and EsxH (ID:  
117 2KG7) (19) was obtained from RCSB Protein Data Bank (<http://www.rcsb.org>) (25). For this  
118 study, out of thirty conformers fetched from PDB, the first model was selected. Protein  
119 coordinates were centered in a dodecahedron box with a 1.5 nm distance between protein and  
120 unit cell walls. AMBER99SB was used as a force field to describe the whole system (26).  
121 Protein was solvated using the SPC water model (27). The system was neutralized by  
122 replacing water molecules until reaching 0.15 M NaCl mimicking physiological conditions.  
123 The neutralized system was energetically minimized for 1000 steps using the steepest descent  
124 algorithm. The system was equilibrated at 310 K with an NVT assembly for 1 ns.  
125 Subsequently, 5 ns of an NPT equilibration at 310 K and 1 atm of pressure was used. At the  
126 end of the equilibration stages, Molecular Dynamics simulations were carried out using the  
127 GROMACS software package version 5.1 (28,29). The Parrinello-Rahman barostat (30) and  
128 the Nosé-Hoover thermostat (31) was used to maintain constant pressure and temperature.  
129 Long-range electrostatic interactions were calculated using the particle-mesh Ewald  
130 algorithm (32), under periodic boundary conditions, with a 0.15 nm grid. We simulated the  
131 system for 500 ns, motion equations were integrated every 2 ps, coordinates and velocities  
132 were saved every 10 ps.

133

134           In order to study the monomer's molecular behavior in solution, 250 ns MD  
135 simulations of each monomer were calculated at 310 K under the same conditions. Monomers  
136 coordinates were taken from 2KG7 model 1.

137

## 138 **Thermal unfolding simulations**

139

140 A thermal unfolding pathway was simulated to understand the relationship between  
141 the structure and thermal stability of the EsxG-EsxH complex. The system was treated  
142 according to Section 2.3. Simulations were conducted for 50 ns at 350, 400, 450, 500, and  
143 550 K, respectively. The initial structure was the same for all simulated systems and  
144 corresponds to the structure after the final NVT simulation.

145

## 146 **Molecular Docking**

147

148 MHC class II molecules are crucial for initiating an antigenic-specific immune  
149 response to presented antigens (33), as well as for the activation, proliferation, and  
150 differentiation of B cells (34). A peptide-protein docking of the selected epitopes was  
151 performed to predict their binding conformation into MHC class II molecules.

152

153 The crystal structure of the human leukocyte antigen (HLA) class II  
154 histocompatibility DRB1 allele (ID: 6BIZ) (35) was obtained from RCSB Protein Data Bank  
155 (25). HLA-DRB1 molecule was selected because it binds to most Mtb epitopes and is the  
156 allele with the highest superficial expression (36). Predicted epitope sequences and HLA-  
157 DRB1 crystal structure were entered in the CABS-Dock server  
158 (<http://biocomp.chem.uw.edu.pl/CABSdock>) (37) for epitope-protein docking, so to obtain  
159 coordinates of the complexes. The most populated cluster model for each complex with the  
160 smallest RMSD value was selected. In order to improve the quality of interactions and



161 peptide presentation, a flexible docking was performed in FlexPepDock server  
162 (<http://flexpepdock.furmanlab.cs.huji.ac.il>) (38), using default parameters; the best resultant  
163 model was selected to perform MD simulations.

164

## 165 **MD simulations: epitopes and HLA-epitopes complexes**

166

167 Coordinates of the four chosen epitopes (section 3.2) were selected and extracted  
168 from the 2KG7 file (model 1). MD simulations of epitopes were carried out along 600 ns for  
169 each epitope, under the same conditions described in Section 2.3. MD simulations of HLA-  
170 epitopes complexes were carried out along 250 ns under the same conditions. Motion  
171 equations were integrated every 2 ps, coordinates and velocities were stored every 10 ps.

172

## 173 **Molecular Dynamics analysis**

174

175 Analysis of unfolding trajectories was done using GROMACS package tools (28,29).  
176 The following parameters were analyzed: Root Mean Square Deviation (RMSD), Root Mean  
177 Square Fluctuation (RMSF), Radius of Gyration (RoG), Hydrogen bonds (Hb), secondary  
178 structure time evolution, Solvent Accessible Surface Area (SASA), clusterization, distance  
179 matrix, and Principal Component Analysis (PCA). Clusterization was performed using the  
180 gromos method (39), using RMSD cutoff 0.2 nm over the backbone atoms. Hydrogen bond  
181 analysis was calculated when donor and acceptor atoms were at a 0.3 nm distance, forming  
182 an angle of  $180^\circ \pm 30^\circ$  for at least 10 ps. Alignments for RMSD, RMSF, RoG were performed  
183 using backbone atoms, PCA was performed using alpha carbons coordinates of residues.

184 Images were made in PyMOL (40) molecular visualization software and Gnuplot  
185 graph package (41).

186

## 187 **Results**

188

### 189 **MHC class II and B cell epitope prediction**

190

191 Considering that TB is an intracellular infection in which antigen presentation  
192 mediated by dendritic cells and macrophages is quite important to activate cell-mediated  
193 immunity, the prediction of MHC class II epitopes is a crucial element. In this regard,  
194 ProPred (20) and NetMHCII 2.3 (21) threw seven epitopes from EsxG protein and fourteen  
195 epitopes for EsxH protein. Promiscuous regions that could bind to several HLA-DR alleles  
196 (S1 Table) were selected to identify residues that were bound to the MHC class II nucleus  
197 and nonamers epitopes.

198

199 One important aspect for an efficient anti-mycobacterial immune response is the  
200 production of antibodies that not only contribute to promoting macrophage opsonization, but  
201 they can mediate the neutralization of these proteins and induce substantial metabolic  
202 abnormalities during iron and zinc bacterial deprivation. Thus, the prediction of linear B cell  
203 epitopes was important. BepiPrep 2.0 prediction (22) resulted in four epitopes for EsxG, with  
204 more than five residues in length, and three residues located in positions 67, 68, and 79. For

205 EsxH, three epitopes were predicted with more than sixteen residues in length. As shown in  
206 Fig 1A, the epitopes were homogeneously located along the sequence of both proteins.

207

208 Discontinuous B cell epitope prediction in DiscoTope 2.0 (23) yielded five residues  
209 for EsxG protein: [M<sup>1</sup>, S<sup>2</sup>, L<sup>4</sup>, F<sup>97</sup>]; and the following residues for EsxH protein as  
210 components of discontinuous B-cell epitopes: [M<sup>1</sup>MSQIMYNYNPAM<sup>11</sup>, H<sup>14</sup>], [E<sup>44</sup>QGDTG<sup>48</sup>,  
211 T<sup>50</sup>], [E<sup>79</sup>NT<sup>80</sup>,<sup>83</sup>MMARD<sup>87</sup>], [E<sup>90</sup>, A<sup>92</sup>, W<sup>94</sup>WGG<sup>96</sup>] (Fig 1B).

212

213 Kolaskar and Tongaonkar's prediction, a semi-empirical method that uses  
214 physicochemical properties of amino acids was used to predict antigenic determinants (24).  
215 Protein regions that satisfied the threshold value (antigenic propensity threshold 1.00) were  
216 predicted to be potential antigenic sites in which antibodies elicit antigen-specific responses  
217 (Fig 1C).

218

219 **Fig 1. Epitope Prediction.** (A). Linear B cell epitope prediction. Prediction in BepiPred 2.0.  
220 Residues that present a score higher than 0.46 are indicated with an E at the top of the  
221 sequence. Residues with values greater than 0.46 are colored in dark orange. (B).  
222 Discontinuous B cell epitope prediction. Prediction in DiscoTope 2.0. Epitopes predicted are  
223 shown as spheres. (C). Antigenic determinant prediction. Kolaskar and Tongaonkar's  
224 prediction method was employed; x-axis - residue number; y-axis - antigenic propensity.  
225 Residues with antigenic propensity greater than 1.000 were predicted as potential antigenic  
226 sites.

227

## 228 Epitope selection

229

230 We selected three epitopes based on promiscuity to bind MHC class II molecules,  
 231 antigenic propensity, structural stability, lineal and discontinuous prediction of B cells, and  
 232 surface exposition. According to this selection criteria, the epitope G1 (<sup>11</sup>LVASQSAFA<sup>19</sup>)  
 233 was selected from EsxG protein. Epitopes H1 (<sup>5</sup>MYNYPAMLG<sup>13</sup>) and H2  
 234 (<sup>65</sup>LVRAYHAMSSTHE<sup>77</sup>) were chosen from EsxH protein. H2 epitope with thirteen  
 235 residues joint three nonameric epitopes and corresponded to the zinc-binding region (19),  
 236 Table 1. One epitope from EsxG protein was selected, which did not meet the selection  
 237 criteria. G2 (<sup>51</sup>FQAAHARFVAAAAKVN<sup>66</sup>), it was used to prove that our exclusion criteria  
 238 was suitable for the selection.

239

240 **Table 1. Epitopes selected.** Amino acid sequence from epitopes selected of protein EsxG  
 241 and EsxH.

| Epitope number | Epitope ID | Epitope sequence                      | Selected epitope | Short name | Selected epitope sequence                    |
|----------------|------------|---------------------------------------|------------------|------------|----------------------------------------------|
| 1              | ep1        | <sup>11</sup> LVASQSAFA <sup>19</sup> | ep1              | G1         | <sup>11</sup> LVASQSAFA <sup>19</sup>        |
| 2              | ep2        | <sup>51</sup> FQAAHARFV <sup>59</sup> | ep2 - ep3        | G2         | <sup>51</sup> FQAAHARFVAAAAKVN <sup>66</sup> |
| 3              | ep3        | <sup>58</sup> FVAAAAKVN <sup>66</sup> |                  |            |                                              |
| 4              | ep4        | <sup>5</sup> MYNYPAMLG <sup>13</sup>  | ep4              | H1         | <sup>5</sup> MYNYPAMLG <sup>13</sup>         |
| 5              | ep5        | <sup>65</sup> LVRAYHAMS <sup>73</sup> | ep5 - ep6 - ep7  | H2         | <sup>65</sup> LVRAYHAMSSTHE <sup>77</sup>    |
| 6              | ep6        | <sup>66</sup> VRAYHAMSS <sup>74</sup> |                  |            |                                              |

|   |     |                                       |  |  |  |
|---|-----|---------------------------------------|--|--|--|
| 7 | ep7 | <sup>69</sup> YHAMSSTHE <sup>77</sup> |  |  |  |
|---|-----|---------------------------------------|--|--|--|

242

## 243 **EsxG·EsxH Complex Molecular Dynamics Simulation**

244

245 In order to understand EsxG·EsxH complex behavior in an aqueous solution, a MD  
246 simulation for 500 ns was performed. RMSD results showed that abrupt changes occurred  
247 from 0 to 9 ns, which might be related to the equilibration phase. The dimer presented two  
248 global conformations corresponding to two phases observed in the RMSD. The first one of  
249 them from 10 ns to 148 ns, the second one from 149 ns until 500 ns, keeping an average  
250 RMSD value of 0.995 nm along the simulation (S1A Fig). The temporary evolution of RoG  
251 was evaluated to understand the dimer's compactness degree. The system started with a RoG  
252 value of 2.245 nm, after 25 ns it fluctuated between 2.237 nm and 1.835 nm. At 149 ns the  
253 molecular compactness increased, it maintained an RMSD average of 1.887 nm (S1B Fig).  
254 These fluctuations coincided with the two RMSD stages previously described. Observing the  
255 trajectory, the compactness was mainly due to the N-terminal of the EsxG monomer, which  
256 adopted a conformation folded toward helix g1a. The folding of the C and N-terminal from  
257 EsxH towards helix h2 (Figs 2A-2C) yielded a more packed structure. RMSF analysis was  
258 performed to determine fluctuating regions of the protein, being residues 1 to 7 from N-  
259 terminal of EsxG monomer the most fluctuating region (1.465 nm), followed by residue 87  
260 (0.718 nm), residue 88 (0.729 nm), residues 95 to 97 from C-terminal of EsxG (0.684 nm),  
261 residues 1 to 6 from N-terminal of EsxH (0.544 nm), and residues 85 to 89 from C-terminal  
262 of EsxH (0.523 nm) (S1C Fig). The results showed that EsxG monomer showed greater  
263 RMSF values than EsxH.

264           The secondary structure analysis revealed the following structural changes on the  
265 alpha-helix of the G monomer: i) residues 3 to 7, which initially formed a coil and bend  
266 structures, which structured into alpha-helix, from 378 ns to 374 ns. ii). Residue 18 lost its  
267 alpha-helix structure after 10 ns of simulation and was restructured again together with  
268 residue 17 from 206 to 382 ns and from 460 ns to 500 ns. iii) Residue 39 lost its alpha-helix  
269 structure from 41 to 78 ns and from 379 to 397 ns. iv) The alpha-helix structure elongated  
270 from residues 39 to 42 in time 2 to 41 ns. v). The g2 helix lengthens at residues 46 to 49 from  
271 78 ns and was maintained up to 500 ns. vi). Residues 74 to 76 changed from turn to alpha-  
272 helix structure during 18 to 61 ns and from 126 to 159 ns. vii) Residues 81 to 84 get an  
273 intermittent structure between alpha-helix and turn from 122 ns until the end of the  
274 simulation. The alpha-helices of monomer EsxH had a more stable secondary structure than  
275 the two described before. In contrast, the following changes were observed in the secondary  
276 structure of the EsxH monomer: i) residues 5 to 9 of the EsxH chain started the simulation  
277 unstructured. They were structured to an alpha-helix from 58 ns and was maintained up to  
278 500 ns of simulation. ii) There was a shortening of helix h1, being residues 21 to 23 the ones  
279 that lost their secondary structure after 103 ns of simulation. iii) Residues 38 to 42 were  
280 structured in alpha-helix from 24 ns to 138 ns, then the structure fluctuated between alpha-  
281 helix and turn until the end of the simulation. iv) Residue 77 to 81 lost its helix structure  
282 between 26 ns to 123 ns, later it recovered its structure. v) Residues 82 to 88 lengthened the  
283 helix intermittently during the simulation. Despite these changes, the dimer maintained its  
284 secondary structure with minimal fluctuations in both monomers (S1D Fig).

285

286           Clusterization showed that 80% of the total visited structures along the simulation  
287 were sorted in the first eight clusters, although the first cluster was the most populated with

288 47.9% (S1E Fig). Hydrogen bonds are important to preserve the native secondary and tertiary  
289 structure of proteins; 140 intra-protein hydrogen bonds on average were kept through the  
290 entire simulation, having a maximum of 169 hydrogen bonds at 320 ns (S1F Fig). A principal  
291 component analysis was performed by using C $\alpha$  atoms to obtain the principal component  
292 covariance matrices. Analyzing the first one, it revealed correlated displacements between 1)  
293 C and N-terminal from EsxG, 2) N-terminal from EsxG monomer and residues 40 to 55 from  
294 EsxG, 3) both terminals from EsxH monomer and N-terminal from EsxG, and 4) the  
295 displacements of the four helices of the heterodimer were correlated themselves (Fig 2D). A  
296 map contact was performed to evaluate the distance among residues, the folding of the C and  
297 N-terminal ends from EsxG and EsxH monomers to their respective helices was shown (Fig  
298 2E). The g2 and h2 helices were the most stable motifs in heterodimer.

299

300 **Fig 2. Global structure behavior from EsxG·EsxH dimer at 310 K.** (A). 0 ns of  
301 simulation. Arrows indicate regions that underwent folding. (B). 149 ns of simulation. (C).  
302 500 ns of simulation. Blue depicts EsxG monomer; orange depicts EsxH monomer. (D). First  
303 principal component covariance matrix. The matrix is color-coded, from red (correlated  
304 displacements) to blue (non-correlated displacements). The diagonal line stands for the  
305 correlation between the residues paired with themselves; the blue stands for the correlation  
306 between each residue pair during the 500 ns simulation. (E). Contact map. The matrix is  
307 color-coded, blue (farthest) to red (closest). The diagonal line represents the zero distance  
308 between the residues paired with themselves, while spots represent the distances (nm) for  
309 each residue pair during the 500 ns simulation ([V1 Video](#) in supporting information).

## 310 **Monomers Molecular Dynamic Simulation**

311

312 In order to study the monomer's molecular behavior in solution, MD simulations of  
313 each monomer at 310 K were carried out. The EsxG monomer RMSD value stabilized at 57  
314 ns. After this time, one conformational structure with an average of 1.292 nm was presented  
315 (S2A Fig) and an average RoG of 1.459 nm (S2B Fig). An average of 62 intra-protein  
316 hydrogen bonds, with a maximum of 79 bonds at 185 ns, and a minimum of 47 bonds at 267  
317 ns were found (S2C Fig). N and C-terminal were the most fluctuating regions, with an RMSF  
318 value of 0.823 nm in residue 1 and 1.223 nm in residue 97, respectively (S2D Fig). Both  
319 terminals folded toward g2 helix (Figs 3A-3C). Secondary structure analysis revealed that  
320 residues 15 to 19 fluctuated between a turn structure and alpha-helix after 37 ns, while  
321 residues 41 to 43 after 101 ns form a turn structure, residues 63 to 65 after 49 ns fold into a  
322 turn structure. Residues 75 and 76 fluctuated between turn and alpha-helix structure after 18  
323 ns, residues 91 to 95 changed from coil to alpha-helix structure between 58 and 98 ns of  
324 simulation (S2E Fig). In this case, 75% of the structures were found in the first five clusters,  
325 being the first cluster the most populated one with 42.8% (S2F Fig). The first principal  
326 component covariance matrix showed correlation movements between the N and C-terminal.  
327 While an anticorrelation between the N and C ends with the g1 and g2 helices was found (Fig  
328 3D); these movements caused the loss of the secondary structure.

329

330 On the other hand, the EsxH monomer structure stabilized at 66 ns, with an RMSD  
331 average of 0.926 nm and a RoG of 1.795 nm (S3A and S3B Figs, respectively). An average  
332 of 63 intra-protein hydrogen bonds was maintained, with a maximum of 85 bonds at 7 ns and



333 a minimum of 44 bonds at 160 ns and 269 ns (S3C Fig). Residues 19, 29 to 36, 50 to 70, and  
334 the C-terminal presented the greatest fluctuation with a maximum RMSF value of 0.848 nm.  
335 The least fluctuating regions were residues 9 to 15 with an RMSF between 0.225 and 0.333  
336 nm, and residues 76 to 88 with 0.121 to 0.203 nm (S3D Fig). Helix h1 had an important loss  
337 of secondary structure. Moreover, residues 24 to 27 were maintained throughout the  
338 simulation whereas residues 28 to 31 were only maintained until 66 ns, but the alpha-helix  
339 structure was later lost and restructured at 218 ns. After 188 ns of simulation, residues 34 to  
340 44 were structured in an alpha-helix, which was maintained at the end of the simulation (S3E  
341 Fig). Helix h2 maintained a regular stability of secondary structure (Figs 3E-3G).  
342 Particularly, 59% of the structures were found in the first 15 clusters, the two initial clusters  
343 presented a larger population of structures (S3F Fig). Anticorrelated motions were observed  
344 between residues 29 to 41 and 17 to 27 and residues 27 to 47 and from 47 to 71 (Fig 3H).  
345 These results demonstrated that EsxH did not have a stable secondary structure as a  
346 monomer, as it was found for EsxG.

347

348 **Fig 3. Global structure behavior of EsxG at 310 K.** (A). at 0 ns of simulation. (B). at 57  
349 ns of simulation. (C). at 250 ns of simulation. (D). First principal component covariance  
350 matrix. The matrix is color-coded, from red (correlated displacements) to blue (non-  
351 correlated displacements). The diagonal line stands for the correlation between the residues  
352 paired with themselves, while the color stands for the correlation between each residue pair  
353 during the 250 ns simulation. **Global structure of the first cluster from EsxH at 310 K.**  
354 (E). 0 ns of simulation. (F). 66 ns of simulation. (G). 250 ns of simulation. (H). First principal  
355 component covariance matrix.

356

## 357 **Thermal unfolding**

358

359 MD simulations supply data related to the unfolding pathway and structural stability  
360 at elevated temperatures. Therefore, MD simulations were carried out at different  
361 temperatures. Fig 4A shows the initial structure of the dimer. The folding of the N-terminal  
362 of EsxG occurred at 5 ns of simulation at 350 K. Residues 20 to 24 from helix h1a evolved  
363 to an irregular secondary structure, which remained until 50 ns. At 50 ns of simulation, both  
364 ends folded into the EsxG helices. These observations corresponded to the evolution of the  
365 RMSD value, which had variations between 0.7 nm and 1.1 nm, from 7 to 30 ns of the  
366 simulation. After this time, the structure stabilized and remained close to the mean (0.858  
367 nm) (S4A Fig). The RoG value was close to the mean (1.897 nm) after 10 ns (S4B Fig). The  
368 most fluctuating region was the N-terminal of the EsxG monomer with an RMSF value of  
369 0.97 nm, followed by the C-terminal of EsxG and ExH monomer with an RMSF value of  
370 0.84 nm (S4C Fig). The average of the intra-protein hydrogen bonds was 132 (S4D Fig).

371

372 The dimer underwent relevant structural changes when applying kinetic energy by  
373 increasing temperature. As these changes occurred quickly, just the first 5 ns of the  
374 simulations from 400 K to 550 K were considered for analysis.

375

376 The average structure at 400 K (Fig 4D), 450 K (Fig 4E), 500 K (Fig 4F), and 550 K  
377 (Fig 4G) were calculated. Fig 4G shows a significant loss of native conformation. Regarding  
378 RMSD, the average values were 0.887 nm (S5A Fig), 0.810 nm (S5B Fig), 1.292 nm (S5C  
379 Fig), and 1.417 nm (S5D Fig), respectively. At 400 K, the radius of gyration was larger (2.142

380 nm) than 310 K and 350 K (S5E Fig) because the N-terminal of the EsxG monomer unfolded,  
381 as did residues 76 and 77 (Thr and His) of the EsxH monomer. Despite this, the secondary  
382 structure of the helix was maintained during the simulation (S6A Fig). However, the intra-  
383 protein Hb decreased to 132 (S6E Fig).

384

385 **Fig 4. Average structures from EsxG·EsxH dimer thermal unfolding simulations.** (A).  
386 0 ns of simulation. (B). 5 ns of simulation at 350 K. (C). 50 ns of simulation at 350 K. (D). 5  
387 ns of simulation at 400 K. (E). 5 ns of simulation at 450 K. (F). 5 ns of simulation at 500 K.  
388 (G). 5 ns of simulation at 550 K.

389

390 At 450 K, the compactness of the dimer was directly proportional to the increase in  
391 temperature being RoG average values as follows: 1.962 nm at 450 K (S5F Fig), 1.920 nm  
392 at 500 K (S5G Fig), and 1.768 nm at 550 K (S5H Fig). At 450 K, residues 30 to 40 from  
393 helix g1 lost their regular secondary structure at 2 ns of simulation. Helix h1 also lost its  
394 structure after 2 ns (S6B Fig). Furthermore, helix g1 preserved its structure until 2 ns, but it  
395 completely lost its secondary structure. In the opposite way, residues 53 to 60 corresponding  
396 to the EsxH monomer kept its structure. Helix g2 has higher stability in terms of secondary  
397 structure (S6C Fig).

398

399 At 550 K, residues 20 to 30 of the EsxG monomer were maintained during 1.5 ns,  
400 and residues 50 to 62 along 5 ns of simulation. EsxH monomer lost its regular secondary  
401 structure, turns and a beta secondary structure predominated (S6D Fig).

402

403 As for Hydrogen bonds, when the temperature was increased to 450 K the intra-  
404 protein Hb average number decreased to 125 (S6F Fig), at 500 K, Hb decreased to 113 (S6G  
405 Fig), and at 550 K in the beginning of the simulation decreased to 110 then increased to 145  
406 (S6H Fig). The increase can be explained by interactions generated with the change of motifs  
407 in the secondary structure.

408

## 409 **MD simulations: epitopes and HLA-epitopes complexes**

410

411 In order to study the behavior of the epitopes in solution, MD simulations of the  
412 selected peptides under physiological conditions were carried out. Furthermore, these  
413 epitopes were docked to the MHC-II HLA molecule (ID: 6BIZ) to predict how epitopes are  
414 bonded in the HLA to observe the epitope behavior while forming the complex, and to  
415 describe the intermolecular interactions formed in the HLA/epitope complexes. Moreover,  
416 MD simulations were carried out from the HLA/epitope complexes to compare them with  
417 the epitope solution dynamics.

418 For epitope G1, one global conformation was observed with a RMSD value of 0.310  
419 nm (S7A Fig). The RMSD of the G2 epitope fluctuated throughout the simulation; the epitope  
420 got three conformations, the first one from 0 to 192 ns, the second one from 194 ns to 231  
421 ns, and the third one from 232 ns to the end of the simulation (S7B Fig). H1 epitope adopted  
422 a global conformation throughout the simulation, which was maintained with a RMSD of  
423 0.095 nm (S7C Fig). For H2 epitope, a global conformation was found with a RMSD of 0.297  
424 nm (S7D Fig). G2 epitope presented several conformations throughout the simulation. When  
425 we compared the RMSD of G1, G2, and H2 epitopes loaded in the HLA, similar behavior

426 for the G1 complex was found, which indicated no change in the conformation (S7A Fig). In  
427 G2, H1, and H2 complexes, we observed an increase in the RMSD. G2 complex had one  
428 conformation until 234 ns. H1 complex showed three conformations from 0 ns to 32 ns, from  
429 33 ns to 151 ns, and from 152 ns to 250 ns (S7C Fig). In the H2 complex, two conformations  
430 were observed from 0 ns to 40 ns, the second one from 50 ns to 250 ns (S7D Fig).

431

432 The RoG of the epitopes that remained stable in solution throughout the simulation,  
433 showed a mean of 0.833 nm (S7E Fig), 0.806 nm (S7F Fig), 0.709 nm (S7G Fig), and 1.065  
434 nm (S7H Fig) for epitopes G1, G2, H1, and H2, respectively. When the epitopes were  
435 coupled to the HLA molecule, the RoG in the G1 remained without major changes (S7E Fig).  
436 The Rog in the G2 kept stable up to 237 ns, after this time, the structure lost compactness  
437 (S7F Fig). The H1-HLA complex compacted from 18 ns to 132 ns, then lost its compactness  
438 and compacts again at 192 ns (S7G Fig). The RoG decreased during the simulation in the H2  
439 indicating compaction of the structure (S7H Fig).

440

441 The four epitopes in the solution did not present a regular secondary structure (S8A-  
442 8D Figs). The N and C-terminals of the four epitopes in solution were the regions with the  
443 highest RMSF (S9A-9D Figs). In the arrangement of the epitopes to the HLA, epitopes G1,  
444 H1, and H2 continued without having a regular secondary structure. However, the coil and  
445 bend motifs remained constant throughout the simulation (Figs 5A, 5C, 5D) (S8E, 8G and  
446 8H Figs). Interestingly, G2 epitope, when loaded into the HLA, took a regular secondary  
447 structure, residues 7 to 11 formed an alpha-helix structure that was maintained during the  
448 entire simulation (Fig 5B) (S8F Fig). When the epitopes formed a complex with HLA, we  
449 observed a decrease in the RMSF value of the N-terminal from G1 (S9A Fig), and in the C-

450 terminal from G2 (S9B Fig) and H1 (S9C Fig), compared to the solvated epitope. In the H2-  
451 HLA complex, the RMSF of the N and C-ends were the most fluctuating regions, the central  
452 residues of the epitope decreased their RMFS (S9D Fig).

453

454 **Fig 5. Average structures from epitopes in solution and HLA-epitopes complexes. (A).**

455 G1 epitope. (B). G2 epitope. (C). H1 epitope. (D). H2 epitope.

456

457 Concerning clusterization of epitopes in solution, we observed that H1 epitope had  
458 one predominant conformation visited throughout the simulation (S10C Fig). G1, G2, and  
459 H2 epitopes visited at least three conformations during the simulation (S10A, 10B and 10D  
460 Figs). When G1 formed the complex with the HLA, we observed one predominant structure  
461 (S10E Fig), while G2, H1, and H2 even though it has one predominant structure, visited at  
462 least other two conformations during the simulation (S10F-10H Figs).

463

464 We evaluated the total intra-protein bound for each epitope in solution, being 1.68,  
465 2.48, 0.46, and 6.09 for G1, G2, H1, and H2 respectively (S11A-11D Figs). As we expected,  
466 hydrogen bonds increased to 6, 7.75, 4.41, and 9.68 as mean value, respectively, when the  
467 epitopes were coupled to the HLA molecule (S11E-11H Figs). Additionally, we identified  
468 the hydrogen bonds with an occupancy greater than 20% to establish which interactions were  
469 maintained for the longest time during the simulation (Table 2).

470

471 **Table 2. Hydrogen bonds occupancy in HLA-epitopes complexes.**

| Epitope | Occupancy | Residue from Epitope | Epitope | Occupancy | Residue from Epitope |
|---------|-----------|----------------------|---------|-----------|----------------------|
|---------|-----------|----------------------|---------|-----------|----------------------|

|         |                        | – Residue from HLA    |                        |                        | – Residue from HLA    |
|---------|------------------------|-----------------------|------------------------|------------------------|-----------------------|
| G1      | 36.44%                 | V2:m –N82:s (chain B) | H1                     | 45.50%                 | Y2:m –N82:s (chain B) |
|         | 22.59%                 | V2:m –N82:s (chain B) |                        | 36.85%                 | G9:s –W61:s (chain B) |
|         | 38.18%                 | A3:m –Q9:s (chain A)  |                        | 22.21%                 | G9:m –W61:s (chain B) |
|         | 40.57%                 | S4:m –Q9:s (chain A)  |                        | 25.10%                 | G9:s –Q64:s (chain B) |
|         | 33.80%                 | S4:m –Q9:s (chain A)  |                        | 28.29%                 | G9:s –N69:s (chain A) |
|         | 22.99%                 | S4:s –Q9:s (chain A)  |                        | 57.93%                 | G9:s –R71:s (chain B) |
|         | 62.77%                 | F8:m –Q64:s (chain B) | H2                     | 85.09%                 | R3:m –H81:s (chain B) |
|         | 32.78%                 | F8:m –Q64:s (chain B) |                        | 25.82%                 | Y5:s –H81:m (chain B) |
| 27.02%  | F1:m –N82:s (chain B)  | 27.89%                |                        | H6:m –N62:s (chain B)  |                       |
| 24.98%  | F1:m –N82:s (chain B)  | 40.67%                |                        | M8:m –Y30:s (chain B)  |                       |
| 28.78%  | Q2:m –Q9:s (chain A)   | 56.06%                |                        | S9:m –Y47:s (chain B)  |                       |
| 26.06%  | H5:s –E55:m (chain A)  | 42.93%                |                        | S9:s –R71:s (chain B)  |                       |
| 111.12% | R7:s –N66:s (chain B)  | 67.22%                |                        | S10:m –W61:s (chain B) |                       |
| 49.02%  | K14:m –R71:s (chain B) | 38.34%                | H12:s –Y60:m (chain B) |                        |                       |
| 29.20%  | N16:s –R71:s (chain B) | 225.11%               | E13:s –R76:s (chain A) |                        |                       |

472 m – main chain

473 s – side chain

474

475 Finally, the solvent-accessible surface area (SASA) of the epitope in solution or  
476 forming the complex with HLA molecule was evaluated to determine the residues and the  
477 difference in the exposure. The SASA of the epitopes in solution was subtracted from the  
478 SASA of the epitopes forming the complex. These values were denominated as  $\Delta$ SASA (Fig  
479 6). All residues had a  $\Delta$ SASA greater than zero, so a greater area of exposure to solvent was  
480 found in the complex.

481

482 **Fig 6. Solvent accessible surface area (SASA).** (A). G1 epitope. (B). G2 epitope. (C). H1  
483 epitope. (D). H2 epitope. The blue bars depict the SASA from the epitope in solution. The  
484 green bars depict the SASA from the epitope in the MHC. The yellow bars depict the  $\Delta$ SASA,  
485 subtracting the SASA of the epitopes in solution from the SASA of the epitopes forming the  
486 complex.

487

## 488 Discussion

489

490 In this study, we describe a method to rationally select EsxG·EsxH epitopes with the  
491 potential to be vaccine candidates for pulmonary TB. Through bioinformatics tools, we  
492 selected three epitopes with the best immunogenic characteristics: 1) G1 (<sup>11</sup>LVASQSAFA<sup>19</sup>),  
493 H1 (<sup>5</sup>MYNYPAMLG<sup>13</sup>), and H2 (<sup>65</sup>LVRAYHAMSSTHE<sup>77</sup>). Table 3 summarizes the  
494 characteristics of the selected epitopes. G1 epitope prediction was consistent with previous  
495 work that evaluated the response of CD4<sup>+</sup> T cells from mice infected with Mtb to  
496 <sup>6</sup>AHIPQLVASQSAFAAKAGLM<sup>25</sup> synthetic peptide in *in vitro* assays, associating this  
497 peptide with protection (42). H1 epitope prediction was supported with previous studies,



498 which has shown that the N-terminal region, included epitope  
499 <sup>1</sup>MSQIMYNYPAMLGHAGDM<sup>18</sup>, was the most immunogenic of the protein (13,43), but  
500 weakly recognized by T cell (12,13). Interestingly, <sup>3</sup>QMYNYPAM<sup>11</sup> or <sup>4</sup>IMYNYPAM<sup>11</sup>  
501 induced strong specific responses of CD8<sup>+</sup> T cells (44,45) and were highly promiscuous to  
502 bind MHC class I alleles (46). <sup>3</sup>QMYNYPAM<sup>11</sup> residues are the minimum required to  
503 generate cytotoxic response against Mtb in the acute and chronic stage of infection. This  
504 cytotoxic effect is through degranulation mechanism and CD95L-mediated apoptosis (47).  
505 In addition, it has been shown that peptide <sup>5</sup>MYNYPAMLG<sup>1</sup> binds with low affinity to  
506 A\*0201, A\*2402, and A\*3002, MHC class I alleles (46,48). H2 epitope prediction matches  
507 with evidence showing that <sup>61</sup>AMEDLVRAYHAMSSTHEA<sup>78</sup> residues induced a strong  
508 CD4<sup>+</sup> T cell response (49). <sup>63</sup>EDLVRAYHAMSSTHEANTMAMMARDTAEAAKWGG<sup>96</sup>  
509 residues have been more immunogenic in mice vaccinated with BCG (12). In contrast,  
510 epitope <sup>65</sup>LVRAYHAMS<sup>73</sup> was specific to MHC class I molecules (46). Our H2 epitope  
511 includes H70, H76, and E77 residues, involved in the Zn<sup>2+</sup> binding (19). Additionally, we  
512 used G2 epitope to validate our selection strategy. It should be noted that G2 contains  
513 residues previously associated with protection against TB (42). Given that MHC molecules  
514 have high specificity, the difference in a single amino acid can be crucial for T-cell  
515 recognition or ablation (13). Previous studies have shown that the substitution in one amino  
516 acid in EsxH <sup>4</sup>IMYNYPAM<sup>11</sup> epitope, significantly influenced the response and binding to  
517 T cells, such as protection against TB in murine models (43,50).

518

519 **Table 3. Characteristics of the selected epitopes.** Comparison of characteristics from  
520 epitopes in solution and when they are presented into HLA complex

| Analysis                 | G1    | G2    | H1    | H2    | G1-HLA | G2-HLA | H1-HLA | H2-HLA |
|--------------------------|-------|-------|-------|-------|--------|--------|--------|--------|
| RMSD (nm)                | 0.310 | 0.350 | 0.095 | 0.297 | 0.357  | 0.434  | 0.447  | 0.525  |
| RoG (nm)                 | 0.833 | 0.806 | 0.709 | 1.065 | 2.402  | 2.434  | 2.417  | 2.445  |
| Clusters (to cover 60%)  | 13    | 161   | 2     | 3     | 1      | 2      | 4      | 7      |
| Hbonds                   | 1.68  | 2.48  | 0.46  | 6.09  | 6      | 7.75   | 4.41   | 9.68   |
| B-lineal epitope         | Yes   | No    | Yes   | Yes   | N/A    | N/A    | N/A    | N/A    |
| B-conformational epitope | No    | No    | Yes   | No    | N/A    | N/A    | N/A    | N/A    |

521

522 Molecular Dynamics simulations, a tool of structural vaccinology (4) predicts the  
523 stability of EsxG·EsxH complex and describes the epitopes. Our results from EsxG·EsxH  
524 complex at 310 K showed that the N and C ends of EsxG monomer were the most fluctuating  
525 and flexible regions of the complex. However, after 149 ns of simulation, these helices folded  
526 into the core of the EsxG monomer (Fig 2A), and this folding remained stable until the end  
527 of the simulation (Figs 2B, 2C). Despite the secondary structure analysis revealing certain  
528 modifications during the simulation, these changes were not relevant for changing the  
529 secondary structure of the dimer. Thus, the fluctuation and flexibility, coupled with their high  
530 exposition to the solution and the absence of important changes in the secondary structure of  
531 the dimer, could suggest a biological relevance, which is consistent with the conservation of  
532 some residues among mycobacterial species, previously demonstrated by Ilghari and

533 collaborators. Analysis of correlation matrix and contact map (Figs 2D, 2E) were in line with  
534 the characteristic helix-turn-helix hairpin structure, arranged in an antiparallel way, forming  
535 a bundle of 4 helices (19), and we proved that these interactions were held on a 500 ns  
536 simulation, even though  $Zn^{2+}$  ion was not present in the dimer structure. Although we  
537 observed some structural changes during the simulation, these changes did not alter the  
538 regular secondary structure in the dimer, which was corroborated by the fact that the  
539 hydrogen bonds and the RMSD remained constant, indicating that the complex was highly  
540 stable for at least 500 ns. Our results are consistent with previous studies showing that both  
541 monomers form a stable 1:1 heterodimeric complex (51). We observed that the RMSD  
542 increased proportionally with the increase in temperature. As expected, the RoG and  
543 hydrogen bonds decreased, indicating that the protein begins to undergo denaturation.  
544 However, a large part of the secondary structure from the helices was maintained at 450 K  
545 (Figs 4A-4G). These results showed that dimer significantly resisted denaturation. It is  
546 necessary to form  $Zn^{2+}$  ion-protein complex to compare stability and aqueous solution protein  
547 behavior described in this work.

548

549 The simulation of the EsxG monomer behavior in solution confirms the high  
550 fluctuation and flexibility of the N and C ends (Figs 3A-3C). The PCA results showed that  
551 both terminals moved correlatively between them, and they moved in anticorrelation with  
552 the g1 and g2 helices. Additionally, the monomer EsxH showed loss of secondary structure  
553 in helix h1 (Figs 3D-3G), indicating that EsxH as a monomer does not have a stable structure.  
554 Despite this loss of structure, EsxH maintained its helical structure; however, in the analysis  
555 carried out by Lightbody and collaborators, the EsxH monomer did not resist chemical  
556 denaturation, so that a molten globule structure was formed. The analysis of the molten

557 globule structure revealed the formation of a hydrophobic mini nucleus. The nucleus was  
558 formed by tryptophan residues. In this study, the tryptophan SASA was evaluated to  
559 determine the changes in their exposure to the solvent in the EsxH monomer while forming  
560 the complex with EsxG protein to evidence the formation of the hydrophobic nucleus and of  
561 the molten globule. When we evaluated the tryptophan environment, we found that the  
562 solvent exposure of the four tryptophans decreases considerably when the EsxH protein  
563 forms a 1:1 complex with the EsxG (Table 4). The results agree with what was previously  
564 reported by Lightbody and collaborators, where tryptophan residues W43, W54, and W58  
565 formed a hydrophobic core, located at the interface of the EsxG-EsxH complex, while  
566 tryptophan W94 was more exposed. This hydrophobic nucleus is necessary to induce the  
567 partial folding of EsxH and may explain why EsxH as a monomer forms a molten globule.  
568 Our data are in accordance with previous results and support the idea that they functionally  
569 act as a dimer and not as individual proteins. Likewise, this suggests that they could act as a  
570 heterodimer in acidic environments, such as the phagosome, without altering its structure  
571 (51).

572 **Table 4. Solvent Accessible Surface Area in tryptophan residues.**

| Residue | SASA (nm) EsxG-EsxH | SASA (nm) EsxH |
|---------|---------------------|----------------|
| W43     | 0.353               | 0.914          |
| W54     | 0.006               | 0.260          |
| W58     | 0.023               | 0.490          |
| W94     | 0.823               | 1.804          |

573

574           Unfortunately, we were unable to generate an EsxG·EsxH/Zn<sup>2+</sup> complex for the  
575 simulation, since residues involved in metal coordination, as well as the geometry of the  
576 metallic site, are not yet well established. This limitation could have influenced the mobility  
577 of this region. Ilghari and collaborators (19) reported that the implied Zn<sup>2+</sup> binding site was  
578 located at one end of the complex, near the site where a cleft forms, suggesting a potential  
579 site for interaction with a target protein. In our study, we observed the formation of this cleft,  
580 at the very beginning of the simulation, however, this structure lost this conformation a few  
581 ns after the simulation started (Fig 7), which could indicate that the cleft conformation is  
582 restricted to Zn<sup>2+</sup> presence or other targets. Even with the lack of Zn<sup>2+</sup>, the dimer was still  
583 stable during all simulation time.

584

585 **Fig 7. Cleft formation in EsxG·EsxH dimer at 310 K.** (A). 0 ns. (B). 149 ns. (C). 500 ns.  
586 Blue represents the EsxG monomer. Orange represents the EsxH monomer. Residues  
587 involved in cleft formation are presented in light blue (EsxG) and yellow (EsxH).

588

589           Because epitopes in solution are highly flexible and disordered, compared to when they  
590 are part of a protein complex, conformational variations in these can lead to vaccine failure  
591 or success, the reason why we consider it is important to predict the stability of epitopes. Our  
592 results suggest that the H1 epitope was the most stable, presenting one conformation,  
593 suggesting that this was the preferred conformation when it is alone in solution. Despite G1  
594 and H2 epitopes presenting one predominant conformation, they visited at least three  
595 conformations. G2 epitope in solution showed great fluctuation having several conformations  
596 during the 600 ns simulation, which suggests that it is the one with the most variable  
597 conformations in solution. These epitopes bind to multiple alleles of MHC class II molecules,

598 which are useful features for a vaccine candidate in a human population with heterogeneous  
599 HLA (52). HLA class II molecules present antigens to CD4+ T cells, thus being essential for  
600 eliminating Mtb (53). For this reason, we performed a docking to predict the presentation of  
601 selected epitopes. DRB1 allele was selected because this binds the majority of known Mtb  
602 epitopes; furthermore, it is the allele with the greater surface expression (36). Our results  
603 indicate that when G1 formed a complex with HLA presented a predominant structure.  
604 Despite G2 and H2 as complex had a majority conformation, they presented at least three  
605 conformations. Interestingly, G2 epitope folds into an alpha-helix at residues 7 to 12.  
606 Remarkably, H1 epitope visited at least four conformations when the HLA complex was  
607 formed, which suggests that the binding to the HLA is not completely stable (Figs 5A-5D),  
608 which was corroborated by the residues involved in the formation of hydrogen bonds (Table  
609 2).

610

611 The three epitopes proposed and considered in the prediction are B cell receptor  
612 epitopes too (Table 3). Although our predictions included linear and discontinuous epitopes,  
613 most of the B cell epitopes are discontinuous and depend on the conformation. Therefore *in*  
614 *silico* prediction is challenging (3). H1 epitope contains seven residues that match the  
615 discontinuous B cell prediction. Thus, B lymphocytes can produce antibodies against the  
616 EsxG and EsxH proteins that are involved in metabolic processes in Mtb, which could be  
617 both neutralizing or bactericidal antibodies. Finally, the lack of homology of our epitopes  
618 with human and rodent proteins suggests that they might avoid an autoimmune response in  
619 future clinical trials. The EsxG and EsxH sequence identities between species implied that  
620 the predicted epitopes could be used specifically against several Mtb complex strains. These  
621 results support the finding that high conservation between species of Mtb complex and nearly

622 related (13,54) could be used against nontuberculous strains such as *M. kansasii*, *M. szulgai*,  
623 *M. simiae* and *M. gastri*. In agreement with previous studies, mortality related to  
624 nontuberculous mycobacteria surpasses TB infections in developed countries. This added to  
625 the difficulty of eradicating and its substantial re-occurrence, finding new therapies is crucial  
626 (55,56).

627

## 628 **Conclusion**

629

630 This work presented an approach to the rational design of vaccines against pulmonary  
631 TB. Using bioinformatics tools and Molecular Dynamics simulations, we selected three  
632 epitopes that are B-cell or T-cell epitopes. The epitopes were selected from the EsxG·EsxH  
633 complex, proteins involved in metal uptake, drug resistance, and immune response evasion  
634 makes it an ideal target for rational vaccine development. Thus, the three epitopes proposed  
635 in the present work have high potential to be subunit vaccine candidates or conjugated  
636 vaccines. These epitopes can be used in conjunction with adjuvants, or as a boost in BCG  
637 vaccination to have a robust and highly specific immune response. As they are B-cell  
638 epitopes, the generated antibodies could block the binding of metals or proteins involved in  
639 the phagolysosome formation, and thus in the prevention of the immune evasion, which could  
640 compromise Mtb survival. Although Molecular Dynamics simulations are a very reliable tool  
641 to predict molecular behavior, it is mandatory to perform *in vivo* assays with these predicted  
642 epitopes in order to demonstrate their immunogenic activity.

643

## 644 **Acknowledgments**

645

646 MO-CE gratefully acknowledges the scholarship from CONACYT to pursue her  
647 graduate studies. She would also like to express her deep gratitude to the graduate program  
648 in Biochemical Sciences at the National Autonomous University in Mexico (UNAM), for  
649 their continued support in this endeavor. EM thanks to LANCAD supercomputing center for  
650 facilities and infrastructure for calculation and storage data.

651

## 652 **Funding**

653

654 This paper was supported by grant 413957, CVU 406611 from the National Council  
655 for Science and Technology of Mexico (Consejo Nacional de Ciencia y Tecnología-  
656 CONACyT). Project number 21-2019 and 13-2020 by LANCAD supercomputing center.

657

## 658 **Author Contributions**

659

660 **Conceptualization:** Edgar Mixcoha; Constanza Estefania, Martínez-Olivares; Rogelio  
661 Hernández-Pando.

662

663 **Data curation:** Edgar Mixcoha; Constanza Estefania, Martínez-Olivares.

664



665 **Formal analysis:** Edgar Mixcoha; Constanza Estefania, Martínez-Olivares.

666

667 **Funding Acquisition:** Edgar Mixcoha.

668

669 **Investigation:** Edgar Mixcoha; Constanza Estefania, Martínez-Olivares.

670

671 **Methodology:** Edgar Mixcoha; Constanza Estefania, Martínez-Olivares.

672

673 **Resources:** Edgar Mixcoha.

674

675 **Visualization:** Edgar Mixcoha; Constanza Estefania, Martínez-Olivares.

676

677 **Writing – Original Draft:** Constanza Estefania, Martínez-Olivares.

678

679 **Writing-Original Draft Preparation:** Edgar Mixcoha; Constanza Estefania, Martínez-

680 Olivares; Rogelio Hernández-Pando.

681

## 682 **References**

683

684 1. World Health Organization. Global Tuberculosis Report 2021. Geneva; 2021.

685 2. Andersen P, Doherty TM. The success and failure of BCG — implications for a novel

686 tuberculosis vaccine. *Nat Rev Microbiol.* 2005;3(8):656–62.

687 3. Rueckert C, Guzmán CA. Vaccines: From Empirical Development to Rational Design.

- 688 PLoS Pathog. 2012;8(11).
- 689 4. Ribas-Aparicio RM, Castelán-Vega JA, Jiménez-Alberto A, Monterrubio-López GP,  
690 Aparicio-Ozores G. The Impact of Bioinformatics on Vaccine Design and  
691 Development. In: InTechOpen, editor. Vaccines [Internet]. 6th ed. Rijeka, Croatia;  
692 2017. Available from: [https://www.intechopen.com/books/advanced-biometric-](https://www.intechopen.com/books/advanced-biometric-technologies/liveness-detection-in-biometrics)  
693 [technologies/liveness-detection-in-biometrics](https://www.intechopen.com/books/advanced-biometric-technologies/liveness-detection-in-biometrics)
- 694 5. Purcell AW, McCluskey J, Rossjohn J. More than one reason to rethink the use of  
695 peptides in vaccine design. *Nat Rev Drug Discov*. 2007;6(5):404–14.
- 696 6. van 't Wout JW, Poell R, van Furth R. The role of BCG/PPD-activated macrophages  
697 in resistance against systemic candidiasis in mice. *Scand J Immunol*. 1992;36(5):713–  
698 719.
- 699 7. Lu LL, Chung AW, Rosebrock TR, Ghebremichael M, Yu WH, Grace PS, et al. A  
700 functional role for antibodies in tuberculosis. *Cell*. 2016;167(2):433–443.e14.
- 701 8. Serafini A, Boldrin F, Palù G, Manganelli R. Characterization of a *Mycobacterium*  
702 tuberculosis ESX-3 conditional mutant: Essentiality and rescue by iron and zinc. *J*  
703 *Bacteriol*. 2009;191(20):6340–4.
- 704 9. Serafini A, Pisu D, Palù G, Rodriguez GM, Manganelli R. The ESX-3 Secretion  
705 System Is Necessary for Iron and Zinc Homeostasis in *Mycobacterium tuberculosis*.  
706 *PLoS One*. 2013;8(10).
- 707 10. Sloan Siegrist M, Steigedal M, Ahmad R, Mehra A, Dragset MS, Schuster BM, et al.  
708 *Mycobacterial Esx-3 requires multiple components for iron acquisition*. *MBio*.  
709 2014;5(3):e01073-14.
- 710 11. Tinaztepe E, Wei JR, Raynowska J, Portal-Celhay C, Thompson V, Philipsa JA. Role  
711 of metal-dependent regulation of ESX-3 secretion in intracellular survival of

- 712           Mycobacterium tuberculosis. *Infect Immun*. 2016;84(8):2255–63.
- 713           12. Hervas-Stubbs S, Majlessi L, Simsova M, Morova J, Rojas MJ, Nouzé C, et al. High  
714           frequency of CD4+ T cells specific for the TB10.4 protein correlates with protection  
715           against Mycobacterium tuberculosis infection. *Infect Immun*. 2006;74(6):3396–407.
- 716           13. Skjøt RLV, Brock I, Arend SM, Munk ME, Theisen M, Ottenhoff THM, et al. Epitope  
717           Mapping of the Immunodominant Antigen TB10.4 and the Two Homologous Proteins  
718           TB10.3 and TB12.9, Which Constitute a Subfamily of the esat-6 Gene Family. *Infect*  
719           *Immun*. 2002;70(10):5446–53.
- 720           14. Mehra A, Zahra A, Thompson V, Sirisaengtaksin N, Wells A, Porto M, et al.  
721           Mycobacterium tuberculosis Type VII Secreted Effector EsxH Targets Host ESCRT  
722           to Impair Trafficking. *PLoS Pathog*. 2013;9(10).
- 723           15. Mittal E, Skowyra ML, Uwase G, Tinaztepe E, Mehra A, Köster S, et al.  
724           Mycobacterium tuberculosis Type VII Secretion System Effectors Differentially  
725           Impact the ESCRT Endomembrane Damage Response. *MBio*. 2018;9(6):e01765-18.
- 726           16. Ankley L, Thomas S, Olive AJ. Fighting persistence; how chronic infections with  
727           Mycobacterium tuberculosis evade T cell-mediated clearance and new strategies to  
728           defeat them. *Infect Immun* [Internet]. 2020;IAI.00916-19. Available from:  
729           <http://iai.asm.org/content/early/2020/02/19/IAI.00916-19.abstract>
- 730           17. Portal-Celhay C, Tufariello JM, Srivastava S, Zahra A, Klevorn T, Grace PS, et al.  
731           Mycobacterium tuberculosis EsxH inhibits ESCRT-dependent CD4+ T-cell  
732           activation. *Nat Microbiol*. 2016;2(2):1–9.
- 733           18. Peñuelas-Urquides K, González-Escalante L, Villarreal-Treviño L, Silva-Ramírez B,  
734           Gutiérrez-Fuentes DJ, Mojica-Espinosa R, et al. Comparison of gene expression  
735           profiles between pansensitive and multidrug-resistant strains of mycobacterium

- 736 tuberculosis. *Curr Microbiol.* 2013;67(3):362–71.
- 737 19. Ilghari D, Lightbody KL, Veverka V, Waters LC, Muskett FW, Renshaw PS, et al.  
738 Solution structure of the *Mycobacterium tuberculosis* EsxG-EsxH complex:  
739 Functional implications and comparisons with other *M. tuberculosis* Esx family  
740 complexes. *J Biol Chem.* 2011;286(34):29993–30002.
- 741 20. Singh H, Raghava GPS. ProPred: prediction of HLA-DR binding sites.  
742 *Bioinformatics* [Internet]. 2001 Dec 1;17(12):1236–7. Available from:  
743 [https://academic.oup.com/bioinformatics/article-](https://academic.oup.com/bioinformatics/article-lookup/doi/10.1093/bioinformatics/17.12.1236)  
744 [lookup/doi/10.1093/bioinformatics/17.12.1236](https://academic.oup.com/bioinformatics/article-lookup/doi/10.1093/bioinformatics/17.12.1236)
- 745 21. Jensen KK, Andreatta M, Marcatili P, Buus S, Greenbaum JA, Yan Z, et al. Improved  
746 methods for predicting peptide binding affinity to MHC class II molecules.  
747 *Immunology.* 2018;154(3):394–406.
- 748 22. Jespersen MC, Peters B, Nielsen M, Marcatili P. BepiPred-2.0: Improving sequence-  
749 based B-cell epitope prediction using conformational epitopes. *Nucleic Acids Res.*  
750 2017;45(W1):W24–9.
- 751 23. Kringelum JV, Lundegaard C, Lund O, Nielsen M. Reliable B Cell Epitope  
752 Predictions: Impacts of Method Development and Improved Benchmarking. *PLoS*  
753 *Comput Biol.* 2012;8(12):e1002829.
- 754 24. Kolaskar AS, Tongaonkar PC. A semi-empirical method for prediction of antigenic  
755 determinants on protein antigens. *FEBS Lett.* 1990;276(1–2):172–4.
- 756 25. Goodsell DS, Zardecki C, Di Costanzo L, Duarte JM, Hudson BP, Persikova I, et al.  
757 RCSB Protein Data Bank: Enabling biomedical research and drug discovery. *Protein*  
758 *Sci.* 2020;29(1):52–65.
- 759 26. Hornak V, Abel R, Okur A, Strockbine B, Roitberg A, Simmerling C. Comparison of

- 760 Multiple Amber Force Fields and Development of Improved Protein Backbone  
761 Parameters. *PROTEINS Struct Funct Bioinforma*. 2006;65:712–25.
- 762 27. Berendsen HJC, Postma JPM, W.F. van G, J. H. Interaction Models for Water in  
763 Relation to Protein Hydration. In: *Intermolecular Forces The Jerusalem Symposia on*  
764 *Quantum Chemistry and Biochemistry*. Jerusalem, Israel: Springer, Dordrecht; 1981.
- 765 28. Berendsen HJC, van der Spoel D, van Drunen R. GROMACS: A message-passing  
766 parallel molecular dynamics implementation. *Comput Phys Commun*. 1995;91(1–  
767 3):43–56.
- 768 29. Van Der Spoel D, Lindahl E, Hess B, Groenhof G, Mark AE, Berendsen HJC.  
769 GROMACS: Fast, flexible, and free. *J Comput Chem*. 2005;26(16):1701–18.
- 770 30. Parrinello M, Rahman A. Polymorphic transitions in single crystals: A new molecular  
771 dynamics method. *J Appl Phys*. 1981;52(12):7182–90.
- 772 31. Hünenberger PH. Thermostat Algorithms for Molecular Dynamics simulations. *Adv*  
773 *Polym Sci*. 2005;173:105–49.
- 774 32. Darden T, York D, Pedersen L. Particle mesh Ewald: An  $N \cdot \log(N)$  method for Ewald  
775 sums in large systems. *J Chem Phys*. 1993;98(12):10089–92.
- 776 33. Holling TM, Schooten E, van Den Elsen PJ. Function and regulation of MHC class  
777 II molecules in T-lymphocytes: Of mice and men. *Hum Immunol*. 2004;65(4):282–  
778 90.
- 779 34. Katikanenia DS, Jina L. B cell MHC class II signaling: A story of life and death. *Hum*  
780 *Immunol*. 2019;80(1):37–43.
- 781 35. Ting YT, Petersen J, Ramarathinam SH, Scally SW, Loh KL, Thomas R, et al. The  
782 interplay between citrullination and HLA-DRB1 polymorphism in shaping peptide  
783 binding hierarchies in rheumatoid arthritis. *J Biol Chem*. 2018;293(9):3236–51.

- 784 36. Knudsen NPH, Nørskov-Lauritsen S, Dolganov GM, Schoolnik GK, Lindenstrøm T,  
785 Andersen P, et al. Tuberculosis vaccine with high predicted population coverage and  
786 compatibility with modern diagnostics. *Proc Natl Acad Sci U S A*. 2014;111(3):1096–  
787 101.
- 788 37. Kurcinski M, Jamroz M, Blaszczyk M, Kolinski A, Kmiecik S. CABS-dock web  
789 server for the flexible docking of peptides to proteins without prior knowledge of the  
790 binding site. *Nucleic Acids Res*. 2015;43(W1):W419–24.
- 791 38. London N, Raveh B, Cohen E, Fathi G, Schueler-Furman O. Rosetta FlexPepDock  
792 web server - high resolution modeling of peptide-protein interactions. *Nucleic Acids*  
793 *Res*. 2011;39(Web Server issue):W249–53.
- 794 39. Daura X, Gademann K, Jaun B, Seebach D, van Gunsteren WF, Mark AE. Peptide  
795 Folding: When Simulation Meets Experiment. *Angew Chemie Int Ed*.  
796 1999;38(1/2):236–40.
- 797 40. DeLano W. The PyMOL Molecular Graphics System [Internet]. Palo Alto, CA, USA:  
798 Schrödinger, LLC.; 2002. Available from: <http://www.pymol.org>.
- 799 41. Williams T, Kelley C. gnuplot 5.0. An Interactive Plotting Program [Internet]. 2017.  
800 Available from: <http://gnuplot.info>
- 801 42. Coler RN, Dillon DC, Skeiky YAW, Kahn M, Orme IM, Lobet Y, et al. Identification  
802 of Mycobacterium tuberculosis vaccine candidates using human CD4+ T-cells  
803 expression cloning. *Vaccine*. 2009;27(2):223–33.
- 804 43. Lindenstrøm T, Aagaard C, Christensen D, Agger EM, Andersen P. High-frequency  
805 vaccine-induced CD8+ T cells specific for an epitope naturally processed during  
806 infection with M. tuberculosis do not confer protection. *Eur J Immunol*.  
807 2014;44(6):1699–709.

- 808 44. Flórido M, Pillay R, Gillis CM, Xia Y, Turner SJ, Triccas JA, et al. Epitope-specific  
809 CD4+, but not CD8+, T-cell responses induced by recombinant influenza A viruses  
810 protect against Mycobacterium tuberculosis infection. *Eur J Immunol.*  
811 2015;45(3):780–93.
- 812 45. Hoang TTKT, Nansen A, Roy S, Billeskov R, Aagaard C, Elvang T, et al. Distinct  
813 Differences in the Expansion and Phenotype of TB10.4 Specific CD8 and CD4 T Cells  
814 after Infection with Mycobacterium tuberculosis. *PLoS One.* 2009;4(6):e5928.
- 815 46. Axelsson-Robertson R, Ahmed RK, Weichold FF, Ehlers MM, Kock MM, Sizemore  
816 D, et al. Human Leukocyte Antigens A\*3001 and A\*3002 Show distinct Peptide-  
817 Binding Patterns of the Mycobacterium tuberculosis Protein TB10.4: Consequences  
818 for Immune Recognition. *Clin Vaccine Immunol.* 2011;18(1):125–34.
- 819 47. Billeskov R, Vingsbo-Lundberg C, Andersen P, Dietrich J. Induction of CD8 T Cells  
820 against a Novel Epitope in TB10.4: Correlation with Mycobacterial Virulence and the  
821 Presence of a Functional Region of Difference-1. *J Immunol.* 2007;179(6):3973–81.
- 822 48. Axelsson-Robertson R, Weichold F, Sizemore D, Wulf M, Skeiky YAW, Sadoff J, et  
823 al. Extensive major histocompatibility complex class I binding promiscuity for  
824 Mycobacterium tuberculosis TB10.4 peptides and immune dominance of human  
825 leucocyte antigen (HLA)-B\*0702 and HLA-B\*0801 alleles in TB10.4 CD8+ T-cell  
826 responses. *Immunology.* 2010;129(4):496–505.
- 827 49. Dietrich J, Aagaard C, Leah R, Olsen AW, Stryhn A, Doherty TM, et al. Exchanging  
828 ESAT6 with TB10.4 in an Ag85B Fusion Molecule-Based Tuberculosis Subunit  
829 Vaccine: Efficient Protection and ESAT6-Based Sensitive Monitoring of Vaccine  
830 Efficacy. *J Immunol.* 2005;174(10):6332–9.
- 831 50. Axelsson-Robertson R, Ju JH, Kim HY, Zumla A, Maeurer M. Mycobacterium

- 832 tuberculosis-specific and MHC class I-restricted CD8<sup>+</sup> T-cells exhibit a stem cell  
833 precursor-like phenotype in patients with active pulmonary tuberculosis. *Int J Infect*  
834 *Dis* [Internet]. 2015;32:13–22. Available from:  
835 <http://dx.doi.org/10.1016/j.ijid.2014.12.017>
- 836 51. Lightbody KL, Ilghari D, Waters LC, Carey G, Bailey MA, Williamson RA, et al.  
837 Molecular features governing the stability and specificity of functional complex  
838 formation by Mycobacterium tuberculosis CFP-10/ESAT-6 family proteins. *J Biol*  
839 *Chem*. 2008;283(25):17681–90.
- 840 52. Mustafa AS, Skeiky YA, Al-Attayah R, Alderson MR, Hewinson RG, Vordermeier  
841 HM. Immunogenicity of Mycobacterium tuberculosis Antigens in Mycobacterium  
842 bovis BCG-Vaccinated and M. bovis-Infected Cattle. *Infect Immun*.  
843 2006;74(8):4566–72.
- 844 53. Hoft DF. Tuberculosis vaccine development: goals, immunological design, and  
845 evaluation. *Lancet*. 2008;372(9633):164–75.
- 846 54. Davila J, Zhang L, Marrs CF, Durmaz R, Yang Z. Assessment of the genetic diversity  
847 of mycobacterium tuberculosis *esxA*, *esxH*, and *fbpB* genes among clinical isolates  
848 and its implication for the future immunization by new tuberculosis subunit vaccines  
849 Ag85B-ESAT-6 and Ag85B-TB10.4. *J Biomed Biotechnol*. 2010;2010.
- 850 55. Johnson MM, Odell JA. Nontuberculous mycobacterial pulmonary infections. *J*  
851 *Thorac Dis*. 2014;6(3):210–20.
- 852 56. Mirsaeidi M, Machado RF, Garcia JGN, Schraufnagel DE. Nontuberculous  
853 Mycobacterial Disease Mortality in the United States, 1999-2010: A Population-Based  
854 Comparative Study. *PLoS One*. 2014;9(3):1–9.
- 855



## 856 **Supporting information**

857 All Simulations carried out in this work are available to be downloaded in:

858

859 Mixcoha E, Martinez Olivares CE, Hernández-Pando R (2022) Native and Thermal  
860 Unfolding simulations EsxG·EsxH. <https://doi.org/10.6084/m9.figshare.20063552.v1>

861

862 Mixcoha E, Martinez Olivares CE, Hernández-Pando R (2022) Epitopes in solution  
863 Molecular Dynamics Simulations. <https://doi.org/10.6084/m9.figshare.20055002.v1>

864

865 Mixcoha E, Martinez Olivares CE, Hernández-Pando R (2022) Molecular Dynamics  
866 Simulation of MHCII-H2. <https://doi.org/10.6084/m9.figshare.20054138.v2>

867

868 Mixcoha E, Martinez Olivares CE, Hernández-Pando R (2022) Molecular Dynamics  
869 Simulations of MHCII-G1. <https://doi.org/10.6084/m9.figshare.20054159.v3>

870

871 Mixcoha E, Martinez Olivares CE, Hernández-Pando R, Martinez Olivares CE (2022)  
872 Molecular Dynamics Simulation of MHCII-G2.  
873 <https://doi.org/10.6084/m9.figshare.20054402.v1>

874

875 Mixcoha E, Martinez Olivares CE, Hernández-Pando R (2022) Molecular Dynamics  
876 Simulations of MHCII-H1. <https://doi.org/10.6084/m9.figshare.20054423.v1>

877

878 **S1 Table. MHC class-II binding epitope prediction.** 49 HLA-DR alleles were considered  
879 to locate promiscuous binding regions. The output consists of a list of nonameric epitopes  
880 capable of binding into a given HLA-DR allele.

881

882 **S1 Fig. A. Root Mean Square Deviation (RMSD) plot from EsxG·EsxH complex at 310**

883 **K.** Red line represents the RMSD value during 500 ns of simulation. Blue line represents the  
884 RMSD average. Shaded bar represents standard deviation. **B. Radius of Gyration (RoG)**

885 **plot from EsxG·EsxH complex at 310 K.** Red line stand for RoG value during 500 ns of  
886 simulation. Blue line stands for the RoG average. Shaded bar represents standard deviation.

887 **C. Root Mean Square Fluctuation (RMSF) plot from EsxG·EsxH complex at 310 K.** X

888 axis corresponds to residue number. The blue color depicts the EsxG monomer. The orange

889 color depicts the EsxH monomer. **D. Secondary structure plot from EsxG·EsxH complex**

890 **at 310 K.** Residues 1 to 97 represents EsxG monomer, residues 98 to 194 represents EsxH

891 monomer. **E. Clusterization plot from EsxG·EsxH complex at 310 K.** X axis stand for the

892 cluster ID. Y axis stand for the number of structures in the cluster. **F. Hydrogen bonds plot**

893 **from EsxG·EsxH complex at 310 K.** Black line stand for total hydrogen bonds during 500

894 ns of simulation.

895

896 **S1 Video. Contact map from EsxG·EsxH dimer at 310 K, 350K, 400K, 450K, 500K and,**

897 **550K.** All contact map videos are available to watch in:

898 <https://doi.org/10.6084/m9.figshare.20063552>

899

900 **S2 Fig. A. Root Mean Square Deviation (RMSD) plot from EsxG monomer at 310 K.**

901 Red line depict the RMSD value during 250 ns of simulation. Blue line depicts the RMSD

902 average. Shaded bar represents standard deviation. **B. Radius of Gyration (RoG) plot from**  
903 **EsxG monomer at 310 K.** Red line represents RoG value during 250 ns of simulation. Blue  
904 line represents the RoG average. Shaded bar represents standard deviation. **C. Hydrogen**  
905 **bonds plot from EsxG monomer at 310 K.** Black line stand for total hydrogen bonds during  
906 250 ns of simulation. **D. Root Mean Square Fluctuation (RMSF) plot from EsxG**  
907 **monomer at 310 K.** X axis corresponds to residue number. **E. Secondary structure plot**  
908 **from EsxG monomer at 310 K.** X axis corresponds to residue number. **F. Clusterization**  
909 **plot from EsxG monomer at 310 K.** X axis represents the cluster ID. Y axis represents the  
910 number of structures.

911

912 **S3 Fig. A. Root Mean Square Deviation (RMSD) plot from EsxH monomer at 310 K.**  
913 Red line depict the RMSD value during 250 ns of simulation. Blue line depicts the RMSD  
914 average. Shaded bar represents standard deviation. **B. Radius of Gyration (RoG) plot from**  
915 **EsxH monomer at 310 K.** Red line represents RoG value during 250 ns of simulation. Blue  
916 line represents the RoG average. Shaded bar represents standard deviation. **C. Hydrogen**  
917 **bonds plot from EsxH monomer at 310 K.** Black line represents total hydrogen bonds  
918 during 250 ns of simulation. **D. Root Mean Square Fluctuation (RMSF) plot from EsxH**  
919 **monomer at 310 K.** X axis corresponds to residue number. **E. Secondary structure plot**  
920 **from EsxH monomer at 310 K.** X axis corresponds to residue number. **F. Clusterization**  
921 **plot from EsxH monomer at 310 K.** X axis represents the cluster ID. Y axis represents the  
922 number of structures.

923

924 **S4 Fig. A. Root Mean Square Deviation (RMSD) plot from EsxG·EsxH complex at 350**  
925 **K.** Red line stand for the RMSD value during 50 ns of simulation. Blue line stands for the

926 RMSD average. Shaded bar represents standard deviation. **B. Radius of Gyration (RoG)**  
927 **plot from EsxG·EsxH complex at 350 K.** Red line depict RoG value during 50 ns of  
928 simulation. Blue line depicts the RoG average. Shaded bar represents standard deviation. **C.**  
929 **Root Mean Square Fluctuation (RMSF) plot from EsxG·EsxH complex at 350 K.** X axis  
930 corresponds to residue number. The blue color depicts the EsxG monomer. The orange color  
931 represents the EsxH monomer. **D. Hydrogen bonds plot from EsxG·EsxH complex at 350**  
932 **K.** Black line represents total hydrogen bonds during 50 ns of simulation.

933

934 **S5 Fig. A. Root Mean Square Deviation (RMSD) plot from EsxG·EsxH complex at 400**  
935 **K.** Red line represents the RMSD value during 5 ns of simulation. Blue line represents the  
936 RMSD average. Shaded bar represents standard deviation. **B. Root Mean Square Deviation**  
937 **(RMSD) plot from EsxG·EsxH complex at 450 K.** Red line stand for the RMSD value  
938 during 5 ns of simulation. Blue line stands for the RMSD average. Shaded bar stands for  
939 standard deviation. **C. Root Mean Square Deviation (RMSD) plot from EsxG·EsxH**  
940 **complex at 500 K.** Red line depict the RMSD value during 5 ns of simulation. Blue line  
941 depicts the RMSD average. Shaded bar depicts standard deviation. **D. Root Mean Square**  
942 **Deviation (RMSD) plot from EsxG·EsxH complex at 550 K.** Red line represents the  
943 RMSD value during 5 ns of simulation. Blue line represents the RMSD average. Shaded bar  
944 represents standard deviation. **E. Radius of Gyration (RoG) plot from EsxG·EsxH**  
945 **complex at 400 K.** Red line stand for RoG value during 5 ns of simulation. Blue line stands  
946 for the RoG average. Shaded bar stands for standard deviation. **F. Radius of Gyration (RoG)**  
947 **plot from EsxG·EsxH complex at 450 K.** Red line represents RoG value during 5 ns of  
948 simulation. Blue line represents the RoG average. Shaded bar represents standard deviation.  
949 **G. Radius of Gyration (RoG) plot from EsxG·EsxH complex at 500 K.** Red line depict

950 RoG value during 5 ns of simulation. Blue line depicts the RoG average. Shaded bar  
951 represents standard deviation. **H. Radius of Gyration (RoG) plot from EsxG·EsxH**  
952 **complex at 550 K.** Red line represents RoG value during 5 ns of simulation. Blue line  
953 represents the RoG average. Shaded bar represents standard deviation.

954

955 **S6 Fig. A. Secondary structure plot from EsxG·EsxH complex at 400 K.** Residues 1 to  
956 97 depict EsxG monomer, residues 98 to 194 depict EsxH monomer. **B. Secondary**  
957 **structure plot from EsxG·EsxH complex at 450 K.** Residues 1 to 97 depict EsxG  
958 monomer, residues 98 to 194 represents EsxH monomer. **C. Secondary structure plot from**  
959 **EsxG·EsxH complex at 500 K.** Residues 1 to 97 stand for EsxG monomer, residues 98 to  
960 194 stand for EsxH monomer. **D. Secondary structure plot from EsxG·EsxH complex at**  
961 **550 K.** Residues 1 to 97 represents EsxG monomer, residues 98 to 194 represents EsxH  
962 monomer. **E. Hydrogen bonds plot from EsxG·EsxH complex at 400 K.** Black line depict  
963 total hydrogen bonds during 5 ns of simulation. **F. Hydrogen bonds plot from EsxG·EsxH**  
964 **complex at 450 K.** Black line depict total hydrogen bonds during 5 ns of simulation. **G.**  
965 **Hydrogen bonds plot from EsxG·EsxH complex at 500 K.** Black line stand for total  
966 hydrogen bonds during 5 ns of simulation. **H. Hydrogen bonds plot from EsxG·EsxH**  
967 **complex at 550 K.** Black line stand for total hydrogen bonds during 5 ns of simulation.

968

969 **S7 Fig. A. Root Mean Square Deviation (RMSD) plot from G1·HLA complex at 310 K.**  
970 Red line represents the RMSD value from the G1-HLA complex during 250 ns of simulation.  
971 Black line represents the RMSD value from the G1 epitope in solution during 250 ns of  
972 simulation. Blue line represents the RMSD average. Shaded bar represents standard  
973 deviation. **B. Root Mean Square Deviation (RMSD) plot from G2·HLA complex at 310**

974 **K.** Red line depict the RMSD value from the G2-HLA complex during 250 ns of simulation.  
975 Black line depicts the RMSD value from the G2 epitope in solution during 250 ns of  
976 simulation. Blue line depicts the RMSD average. Shaded bar represents standard deviation.

977 **C. Root Mean Square Deviation (RMSD) plot from H1·HLA complex at 310 K.** Red line  
978 stand for the RMSD value from the H1-HLA complex during 250 ns of simulation. Black  
979 line stands for the RMSD value from the H1 epitope in solution during 250 ns of simulation.  
980 Blue line stands for the RMSD average. Shaded bar stands for standard deviation. **D. Root**  
981 **Mean Square Deviation (RMSD) plot from H2·HLA complex at 310 K.** Red line  
982 represents the RMSD value from the H2-HLA complex during 250 ns of simulation. Black  
983 line represents the RMSD value from the H2 epitope in solution during 250 ns of simulation.  
984 Blue line represents the RMSD average. Shaded bar represents standard deviation. **E. Root**  
985 **Mean Square Deviation (RMSD) plot from G1·HLA complex at 310 K.** Red line depict  
986 the RMSD value from the G1-HLA complex during 250 ns of simulation. Green line depicts  
987 the RMSD value from the G1 epitope in solution during 250 ns of simulation. Blue line  
988 depicts the RMSD average. Shaded bar represents standard deviation. **F. Root Mean Square**  
989 **Deviation (RMSD) plot from G1·HLA complex at 310 K.** Red line stand for the RMSD  
990 value from the G2-HLA complex during 250 ns of simulation. Green line stands for the  
991 RMSD value from the G2 epitope in solution during 250 ns of simulation. Blue line stands  
992 for the RMSD average. Shaded bar represents standard deviation. **G. Root Mean Square**  
993 **Deviation (RMSD) plot from H1·HLA complex at 310 K.** Red line depict the RMSD value  
994 from the H1-HLA complex during 250 ns of simulation. Green line depicts the RMSD value  
995 from the H1 epitope in solution during 250 ns of simulation. Blue line depicts the RMSD  
996 average. Shaded bar represents standard deviation. **H. Root Mean Square Deviation**  
997 **(RMSD) plot from H2·HLA complex at 310 K.** Red line represents the RMSD value from

998 the H2-HLA complex during 250 ns of simulation. Green line represents the RMSD value  
999 from the H2 epitope in solution during 250 ns of simulation. Blue line represents the RMSD  
1000 average. Shaded bar represents standard deviation.

1001

1002 **S8 Fig. A. Secondary structure plot from G1 epitope in solution at 310 K.** Residues 1 to  
1003 9 stand for the G1 epitope LVASQSAFA. **B. Secondary structure plot from G2 epitope in**  
1004 **solution at 310 K.** Residues 1 to 16 stand for the G2 epitope FQAAHARFVAAAANKVN. **C.**  
1005 **Secondary structure plot from H1 epitope in solution at 310 K.** Residues 1 to 9 represents  
1006 the H1 epitope MYNYPAMLG. **D. Secondary structure plot from H2 epitope in solution**  
1007 **at 310 K.** Residues 1 to 13 represents the H2 epitope LVRAYHAMSSTHE. **E. Secondary**  
1008 **structure plot from G1 epitope in HLA at 310 K.** Residues 1 to 9 depict the G1 epitope  
1009 LVASQSAFA. **F. Secondary structure plot from G2 epitope in HLA at 310 K.** Residues  
1010 1 to 16 depict the G2 epitope FQAAHARFVAAAANKVN. **G. Secondary structure plot**  
1011 **from H1 epitope in HLA at 310 K.** Residues 1 to 9 depict the H1 epitope MYNYPAMLG.  
1012 **H. Secondary structure plot from H2 epitope in HLA at 310 K.** Residues 1 to 13 depict  
1013 the H2 epitope LVRAYHAMSSTHE.

1014

1015 **S9 Fig. A. Root Mean Square Fluctuation (RMSF) plot from G1 epitope in solution, and**  
1016 **in HLA complex at 310 K.** X axis corresponds to residue number, residues 1 to 9 stand for  
1017 the G1 epitope LVASQSAFA. Blue color stand for G1 epitope in solution. Black color stand  
1018 for G1 epitope in complex with HLA. **B. Root Mean Square Fluctuation (RMSF) plot**  
1019 **from G2 epitope in solution, and in HLA complex at 310 K.** X axis corresponds to residue  
1020 number, residues 1 to 16 depict the G2 epitope FQAAHARFVAAAANKVN. Blue color  
1021 represents G1 epitope in solution. Black color depicts G1 epitope in complex with HLA. **C.**

1022 **Root Mean Square Fluctuation (RMSF) plot from H1 epitope in solution, and in HLA**  
1023 **complex at 310 K.** X axis corresponds to residue number, residues 1 to 9 depict the H1  
1024 epitope MYNYPAMLG. Blue color depicts G1 epitope in solution. Black color depicts G1  
1025 epitope in complex with HLA. **D. Root Mean Square Fluctuation (RMSF) plot from H2**  
1026 **epitope in solution, and in HLA complex at 310 K.** X axis corresponds to residue number,  
1027 residues 1 to 13 represents the H2 epitope LVRAYHAMSSTHE. Blue color represents G1  
1028 epitope in solution. Black color represents G1 epitope in complex with HLA.

1029

1030 **S10 Fig. A. Clusterization plot from G1 epitope in solution at 310 K.** X axis depict the  
1031 cluster ID. Y axis depict the number of structures. **B. Clusterization plot from G2 epitope**  
1032 **in solution at 310 K.** X axis represents the cluster ID. Y axis represents the number of  
1033 structures. **C. Clusterization plot from H1 epitope in solution at 310 K.** X axis stand for  
1034 the cluster ID. Y axis stand for the number of structures. **D. Clusterization plot from H2**  
1035 **epitope in solution at 310 K.** X axis represents the cluster ID. Y axis represents the number  
1036 of structures. **E. Clusterization plot from G1 epitope in HLA at 310 K.** X axis depict the  
1037 cluster ID. Y axis depict the number of structures. **F. Clusterization plot from G2 epitope**  
1038 **in HLA at 310 K.** X axis stand for the cluster ID. Y axis stand for the number of structures.  
1039 **G. Clusterization plot from H1 HLA in solution at 310 K.** X axis represents the cluster  
1040 ID. Y axis represents the number of structures. **H. Clusterization plot from H2 epitope in**  
1041 **HLA at 310 K.** X axis stand for the cluster ID. Y axis stand for the number of structures.

1042

1043 **S11 Fig. A. Hydrogen bonds plot from G1 in solution at 310 K.** Orange line depict total  
1044 hydrogen bonds during 250 ns of simulation. **B. Hydrogen bonds plot from G2 in solution**  
1045 **at 310 K.** Orange line depict total hydrogen bonds during 250 ns of simulation. **C. Hydrogen**



1046 **bonds plot from H1 in solution at 310 K.** Orange line represents total hydrogen bonds  
1047 during 250 ns of simulation. **D. Hydrogen bonds plot from H2 in solution at 310 K.** Orange  
1048 line represents total hydrogen bonds during 250 ns of simulation. **E. Hydrogen bonds plot**  
1049 **from G1 in HLA at 310 K.** Black line stand for total hydrogen bonds during 250 ns of  
1050 simulation. **F. Hydrogen bonds plot from G2 in HLA at 310 K.** Black line stand for total  
1051 hydrogen bonds during 250 ns of simulation. **G. Hydrogen bonds plot from H1 in HLA at**  
1052 **310 K.** Black line represents total hydrogen bonds during 250 ns of simulation. **H. Hydrogen**  
1053 **bonds plot from H2 in HLA at 310 K.** Black line represents total hydrogen bonds during  
1054 250 ns of simulation.

1055

1056 **V1 Fig. A. Hydrogen bonds plot from G1 in solution at 310 K.** Orange line depict total  
1057 hydrogen bonds during 250 ns of simulation.

1058

# A. Linear B-cell epitope prediction

## EsxG

Epitopes : .....EEEEEEEEEEEEEEEE.....EEEEEEEEEEEEEEEEEEEEEEEEEEEEEEEEEEEEEEEE.....EEEEEEEEEEEEEEEEEEEEEEEEEEEE.....  
 Predictions: **MSLLDAHIPQLVASQSAFAAKAGLMRHTIGQAEQAAMSAQAFHQGESSAAFQAAHARFVAAAQVNTLLDVAQANLGEAAGTYVAADAAAASTYTGF**  
 1-----10-----20-----30-----40-----50-----60-----70-----80-----90-----

## EsxH

Epitopes : .....EEEEEEEEEEEE.....EEEEEEEEEEEEEEEE.....EEEEEEEEEEEE.....EE.....E.....EEEE.....  
 Predictions: **SMSQIMYNYPAMLGHAGDMAGYAGTLQSLGAEIAVEQAALQSAWQGDTGITIQAWQAQWNQAMEDLVRAYHAMSSTHEANTMAMMARDTAEAAKWGG**  
 1-----10-----20-----30-----40-----50-----60-----70-----80-----90-----

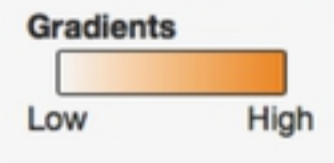

bioRxiv preprint doi: <https://doi.org/10.1101/2022.06.19.496760>; this version posted June 20, 2022. The copyright holder for this preprint (which was not certified by peer review) is the author/funder, who has granted bioRxiv a license to display the preprint in perpetuity. It is made available under aCC-BY 4.0 International license.

# B. Discontinuous B-cell epitope prediction

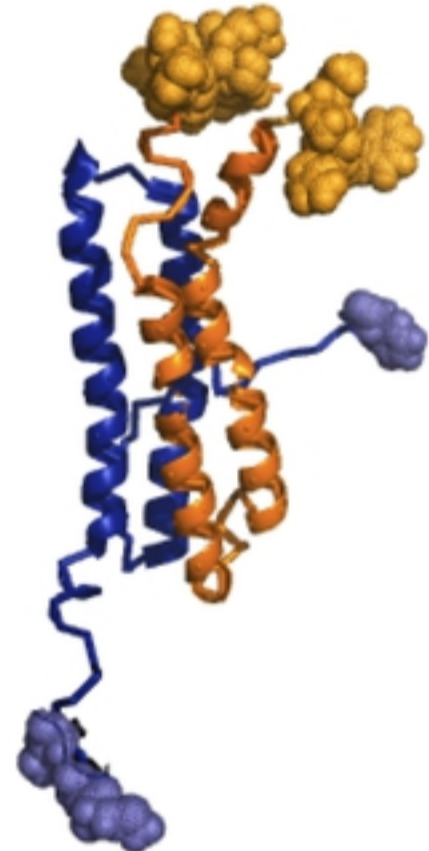

# B. Discontinuous B-cell epitope prediction

## EsxG

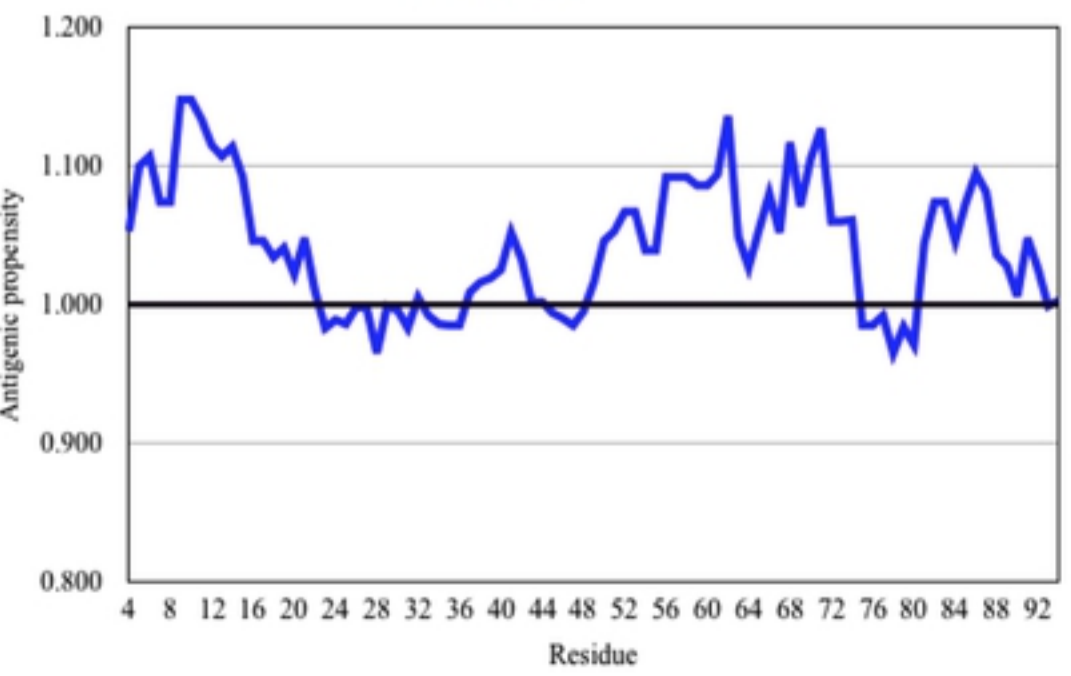

## EsxH

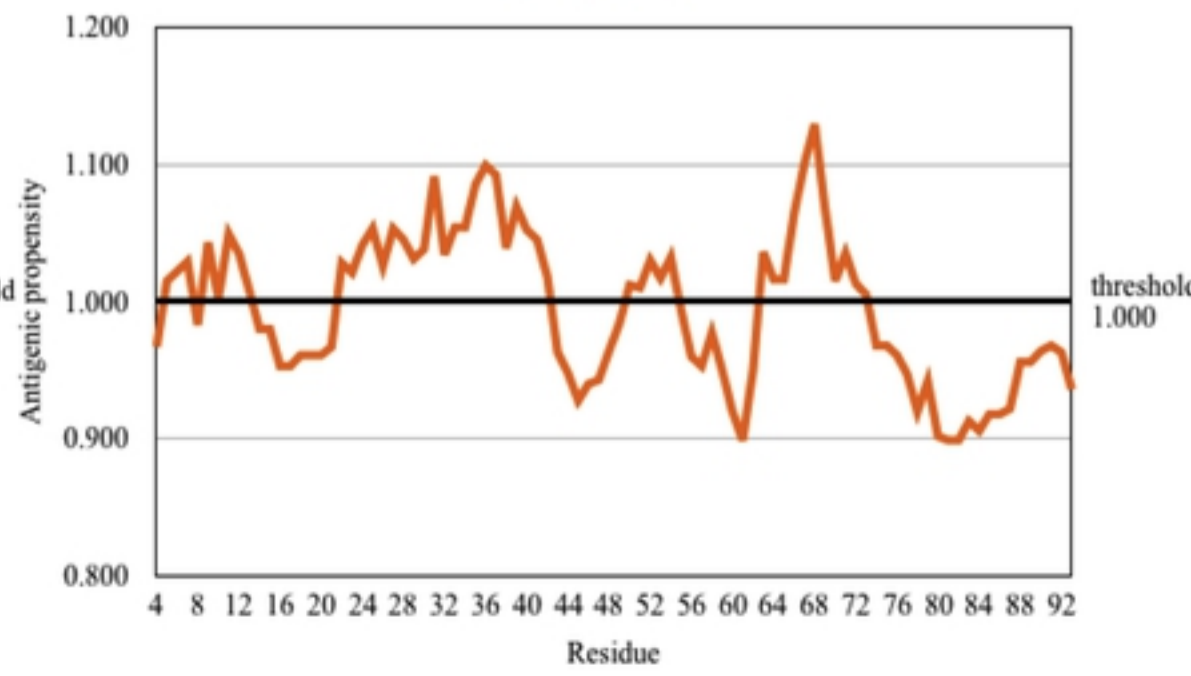

Figure 1

**A. 310 K - 0 ns**

**B. 310 K - 149 ns**

**C. 310 K - 500 ns**

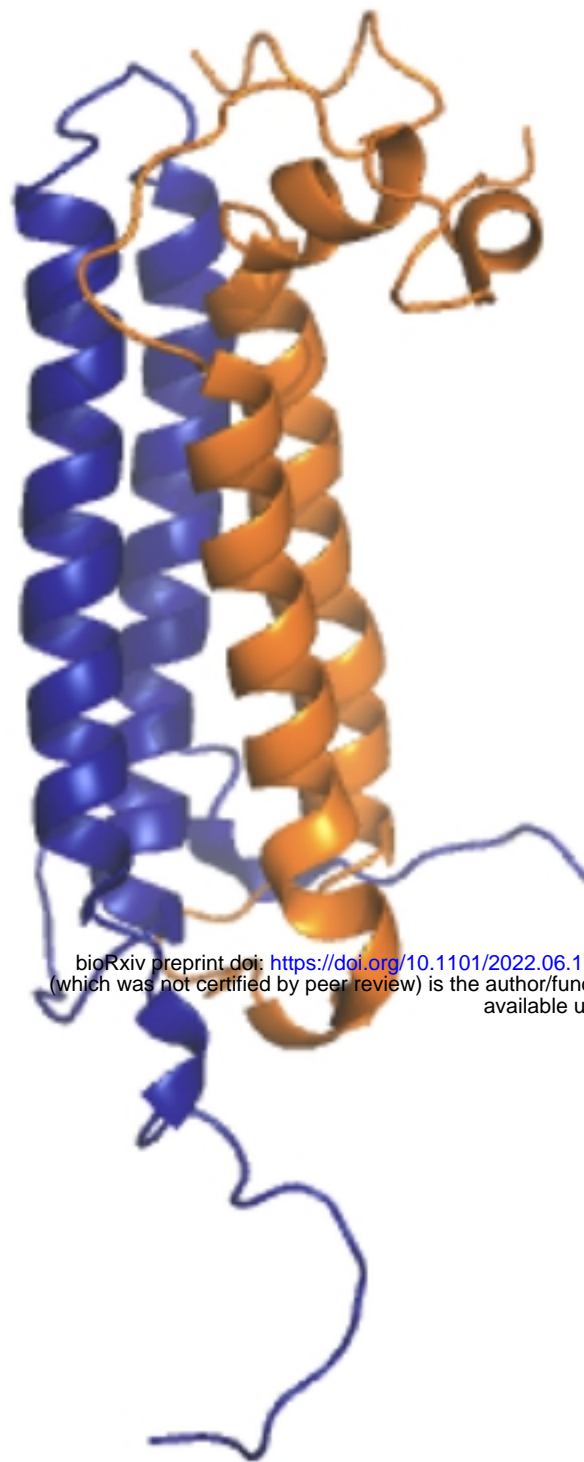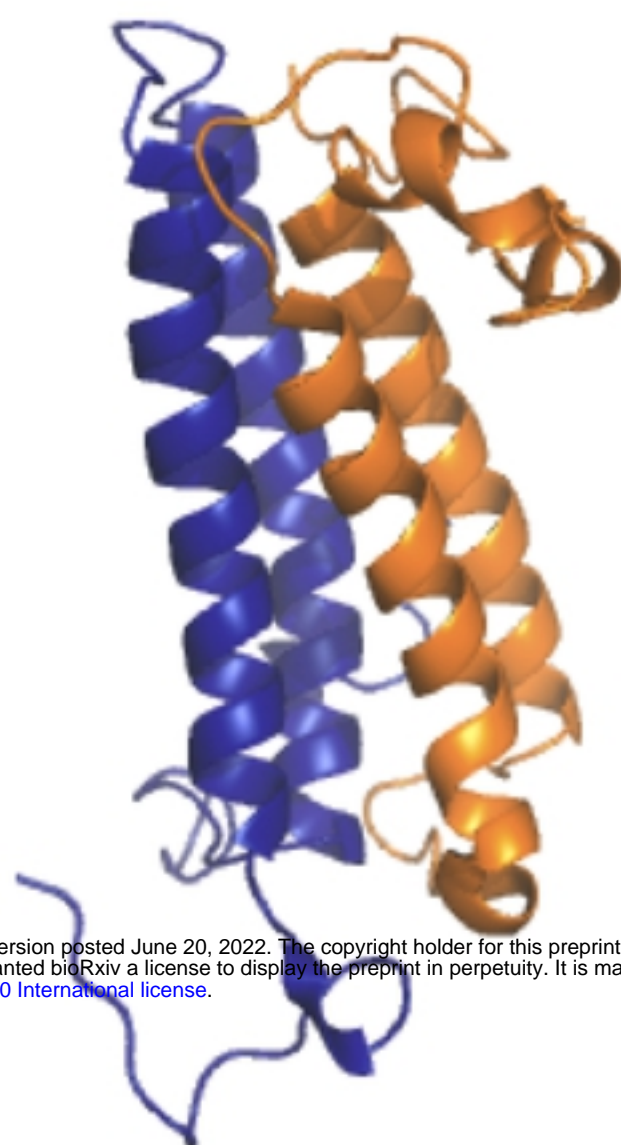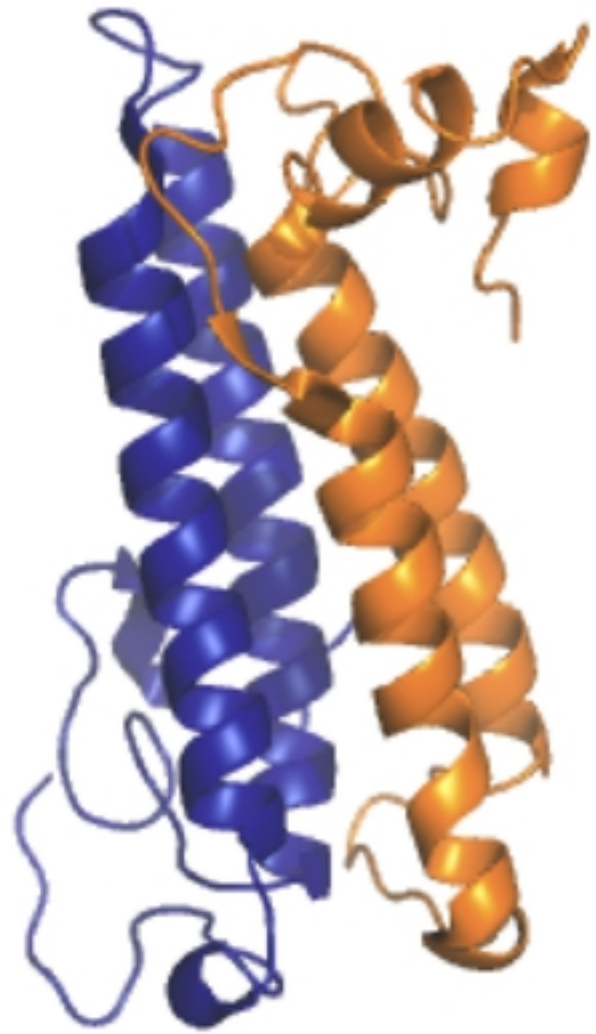

bioRxiv preprint doi: <https://doi.org/10.1101/2022.06.19.496760>; this version posted June 20, 2022. The copyright holder for this preprint (which was not certified by peer review) is the author/funder, who has granted bioRxiv a license to display the preprint in perpetuity. It is made available under aCC-BY 4.0 International license.

**D. Covariance matrix**

**E. Contact map**

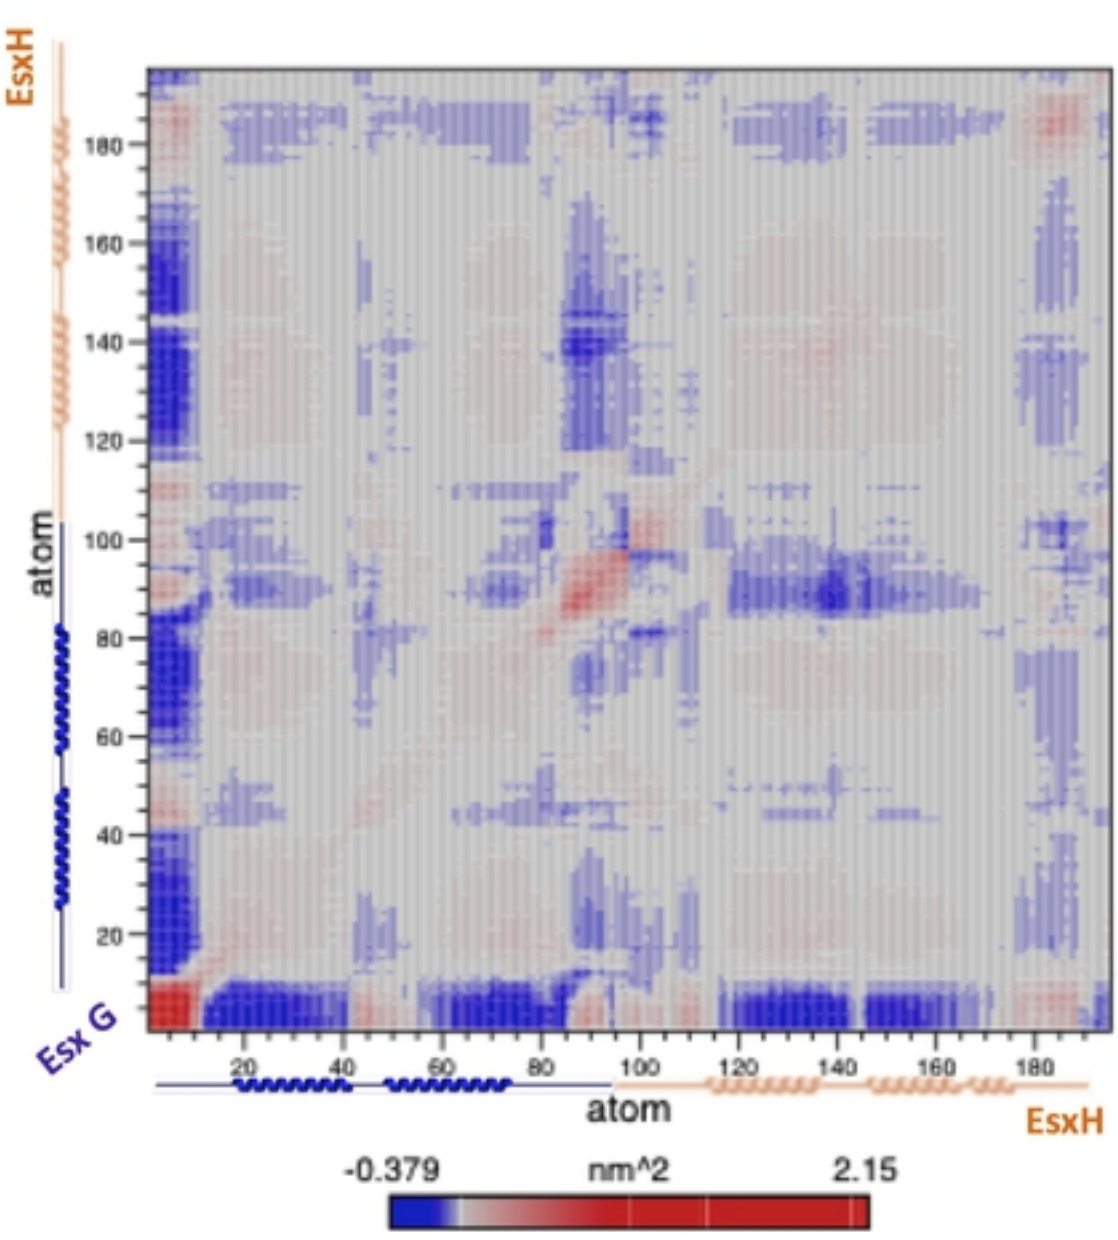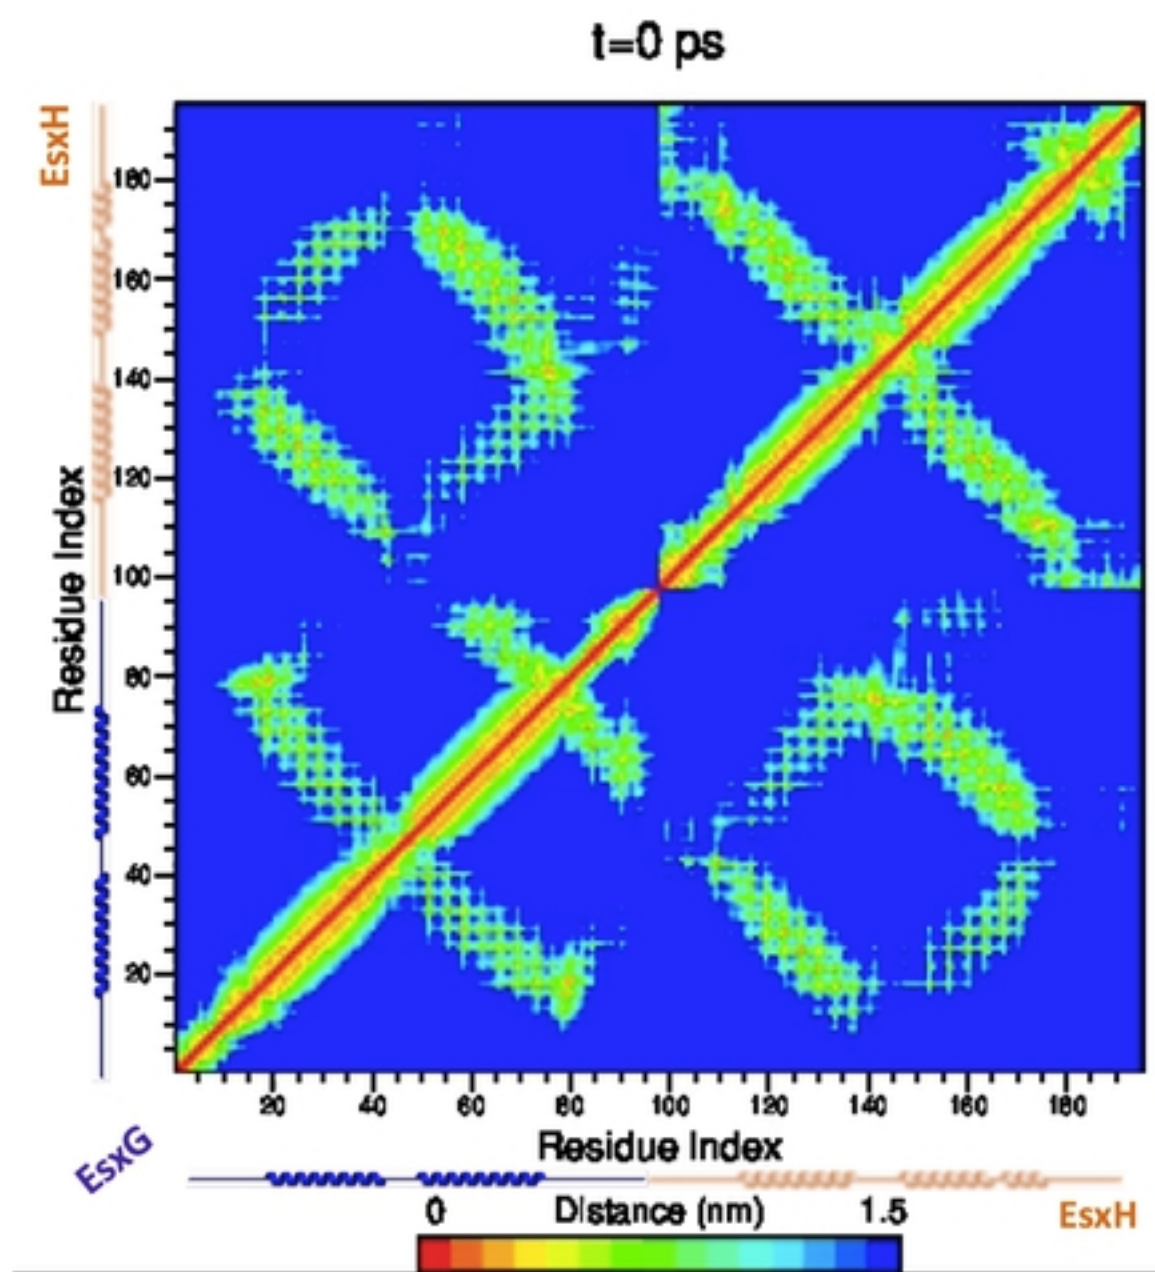

Figure2

**A. EsxG - 0 ns**

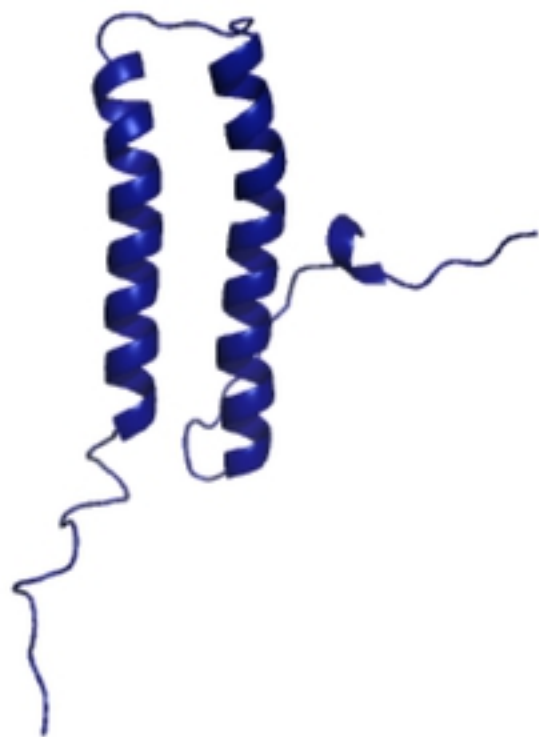

**B. EsxG - 57 ns**

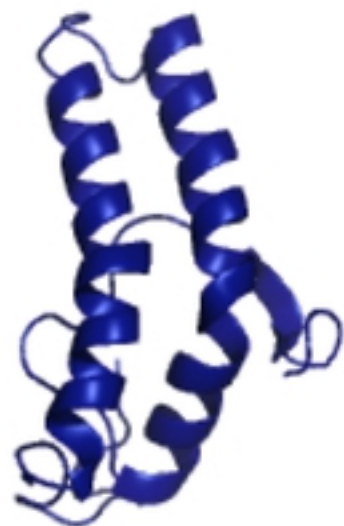

**C. EsxG - 250 ns**

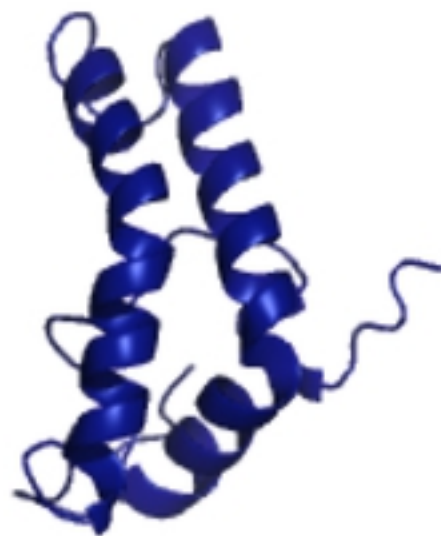

**D. EsxG Covariance matrix**

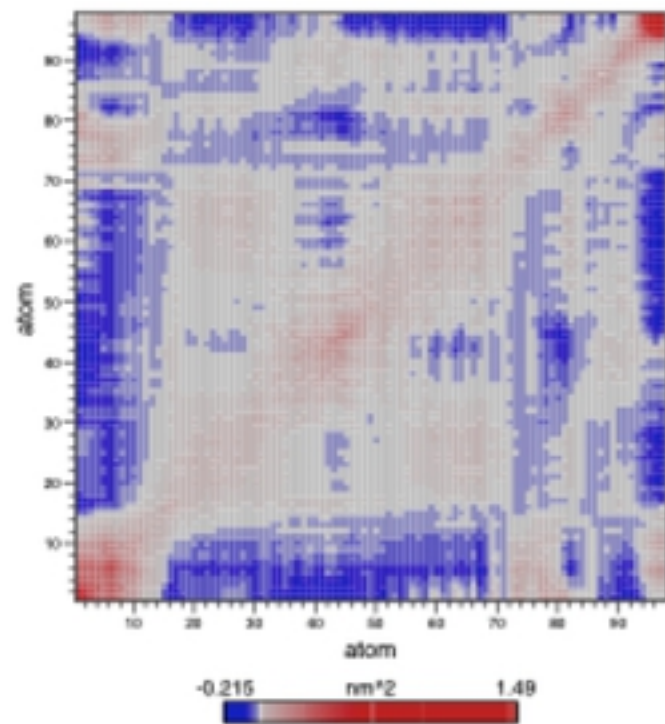

**E. EsxH - 0 ns**

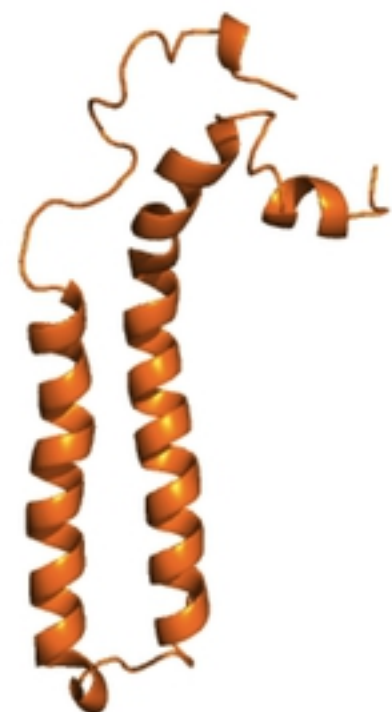

**F. EsxH - 66 ns**

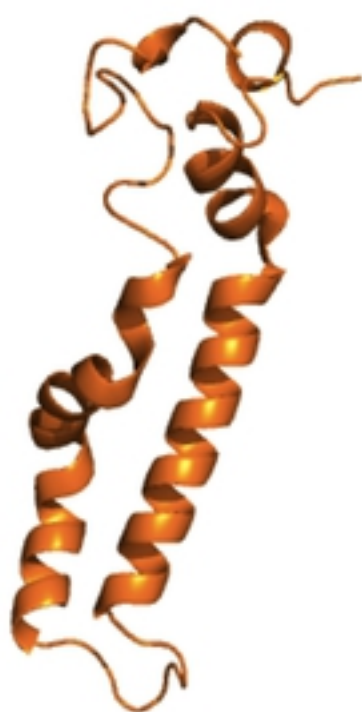

**G. EsxH - 250 ns**

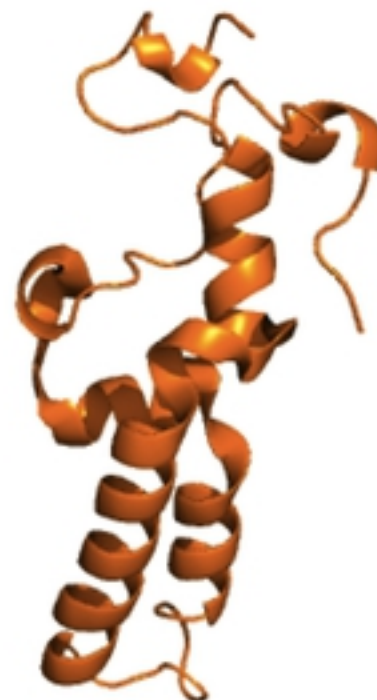

**H. EsxH Covariance matrix**

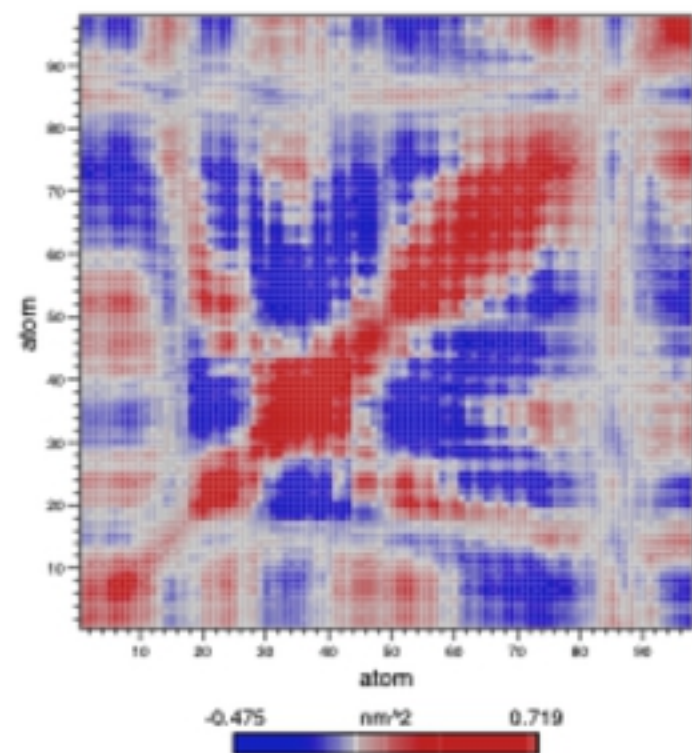

Figure3

**B. 5 ns - 350 K**

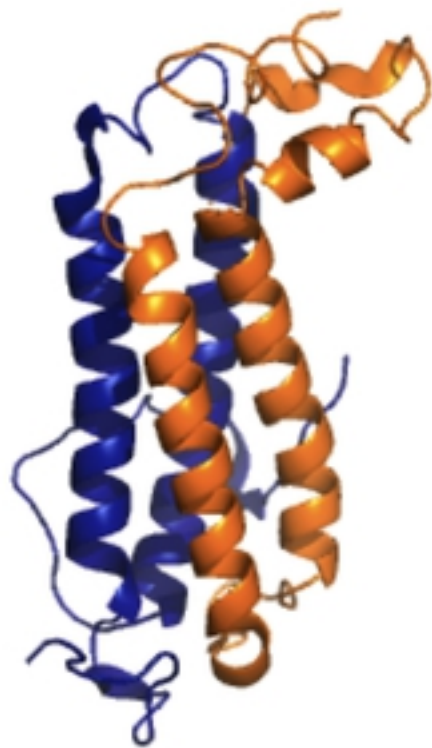

**C. 50 ns - 350 K**

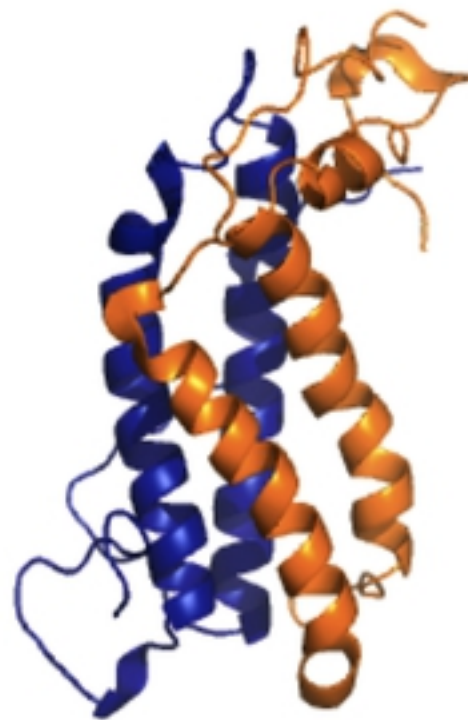

**D. 5 ns - 400 K**

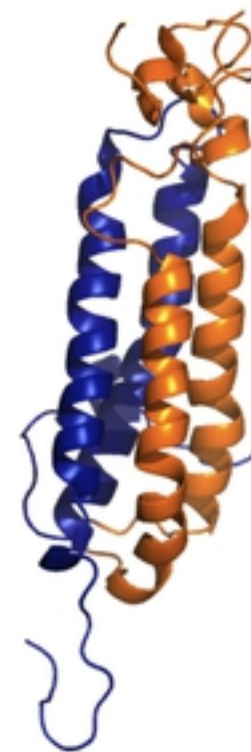

**A. 0 ns - 310 K**

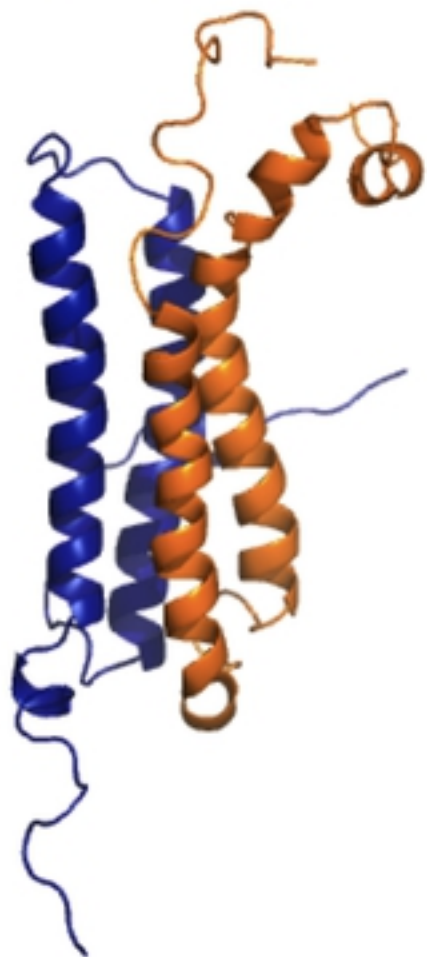

**E. 5 ns - 450 K**

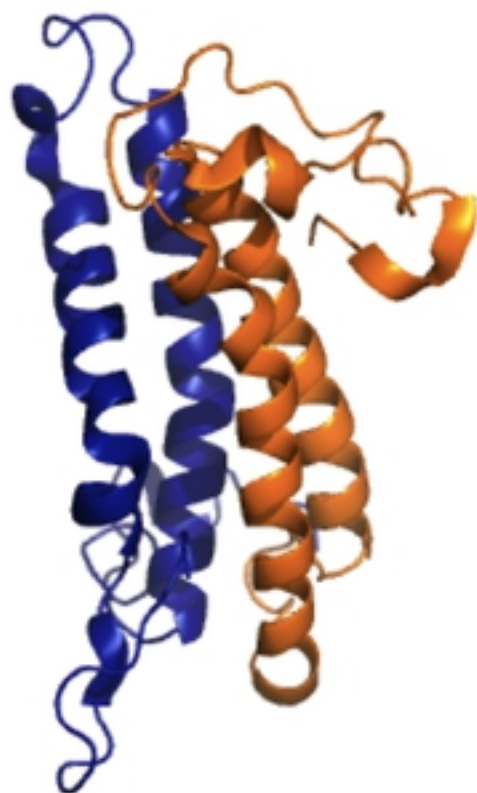

**F. 5 ns - 500 K**

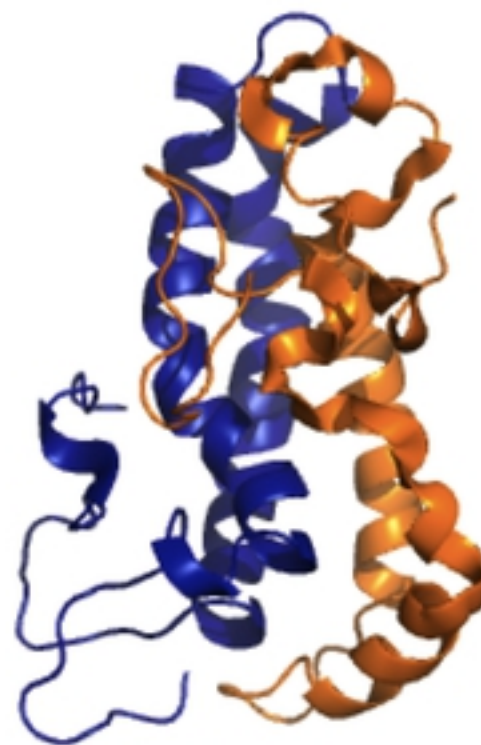

**G. 5 ns - 550 K**

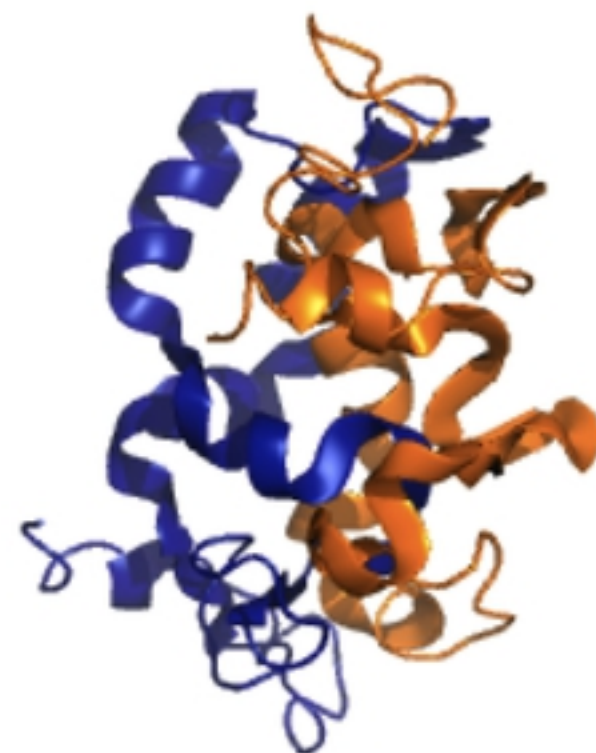

Figure4

### A. G1 epitope

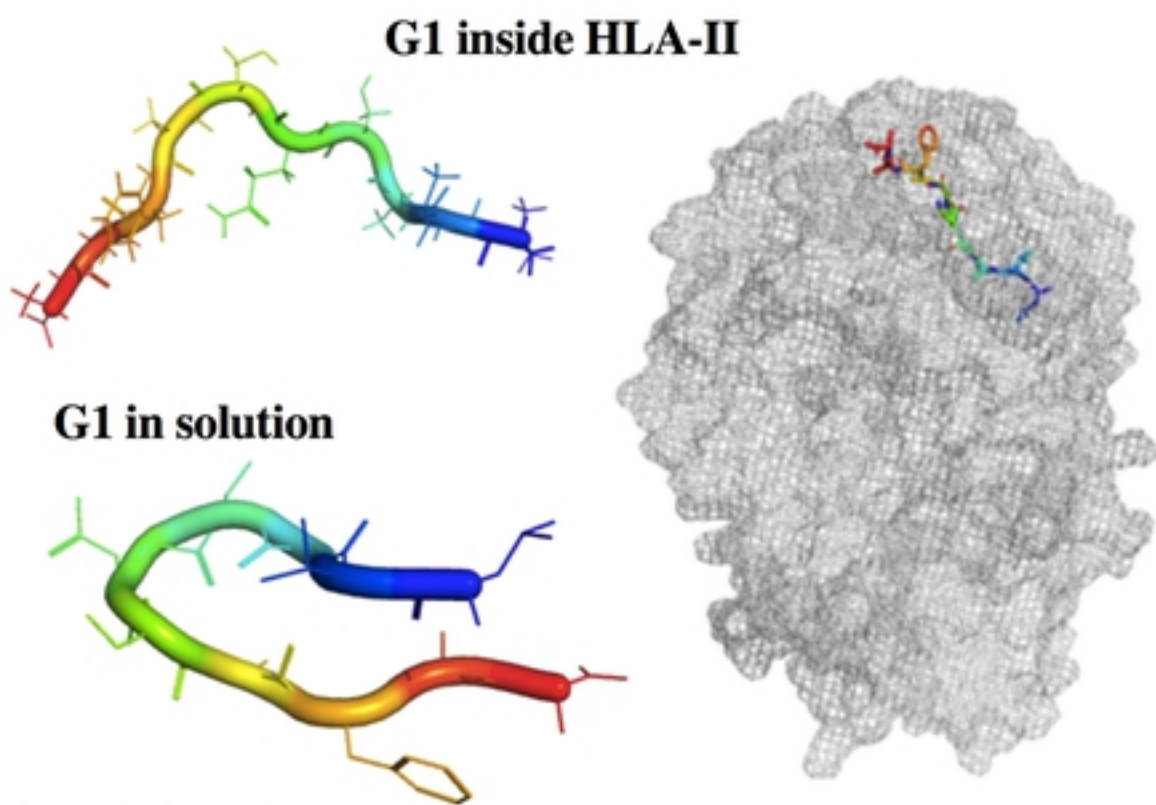

### B. G2 epitope

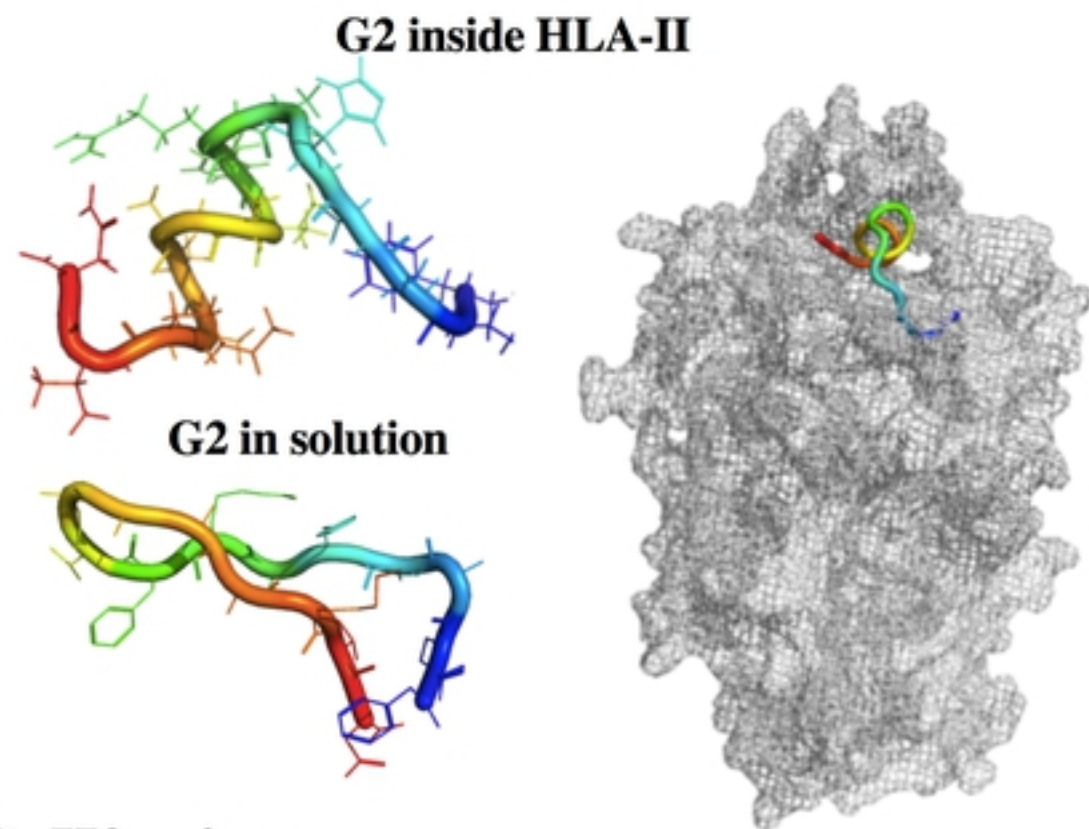

### C. H1 epitope

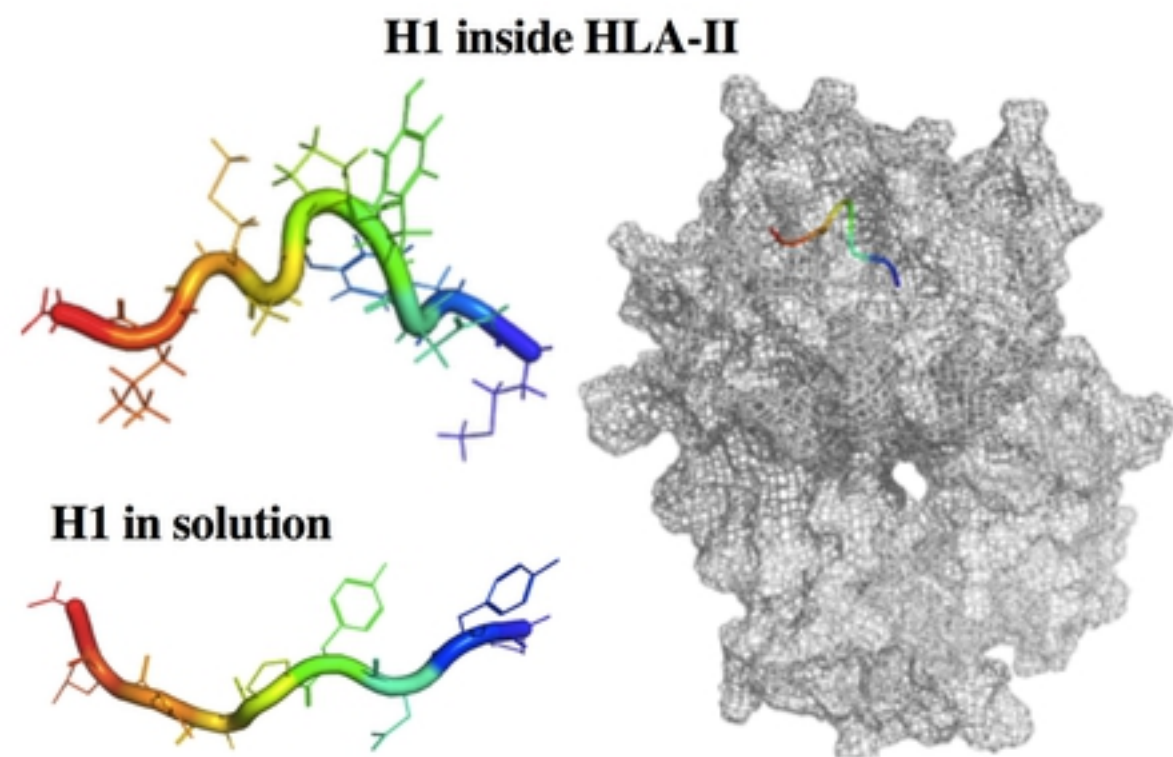

### D. H2 epitope

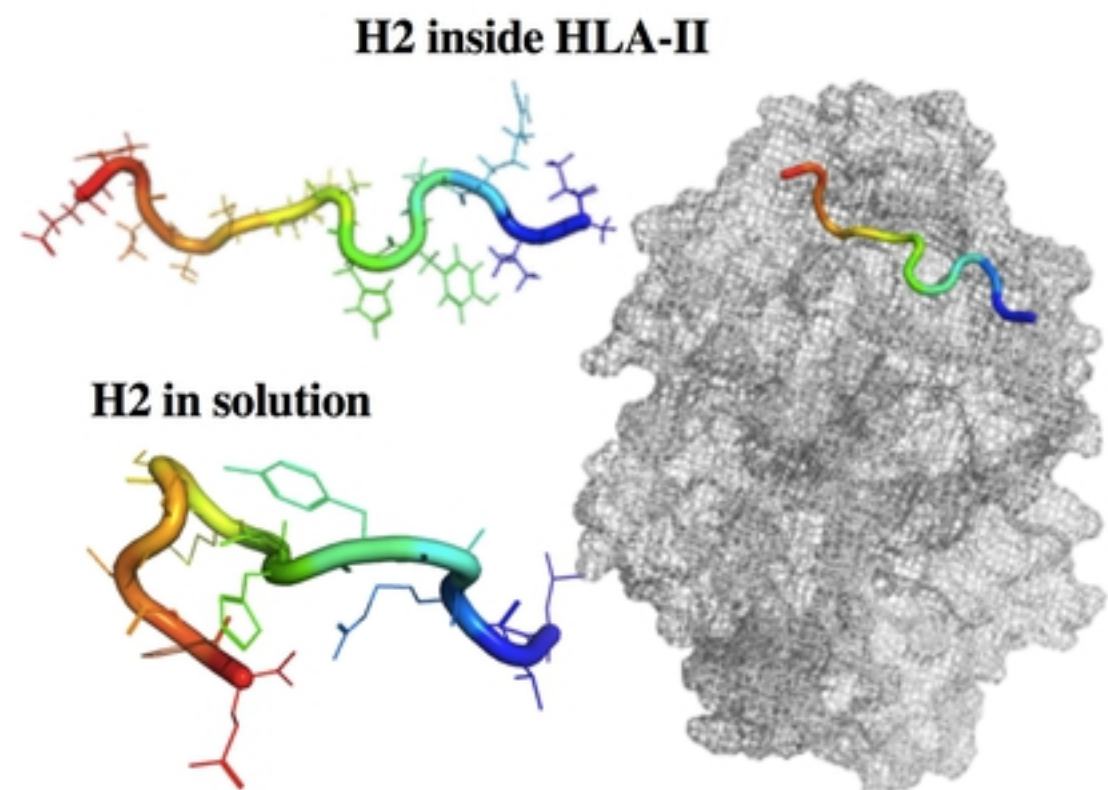

Figure5

## A. G1

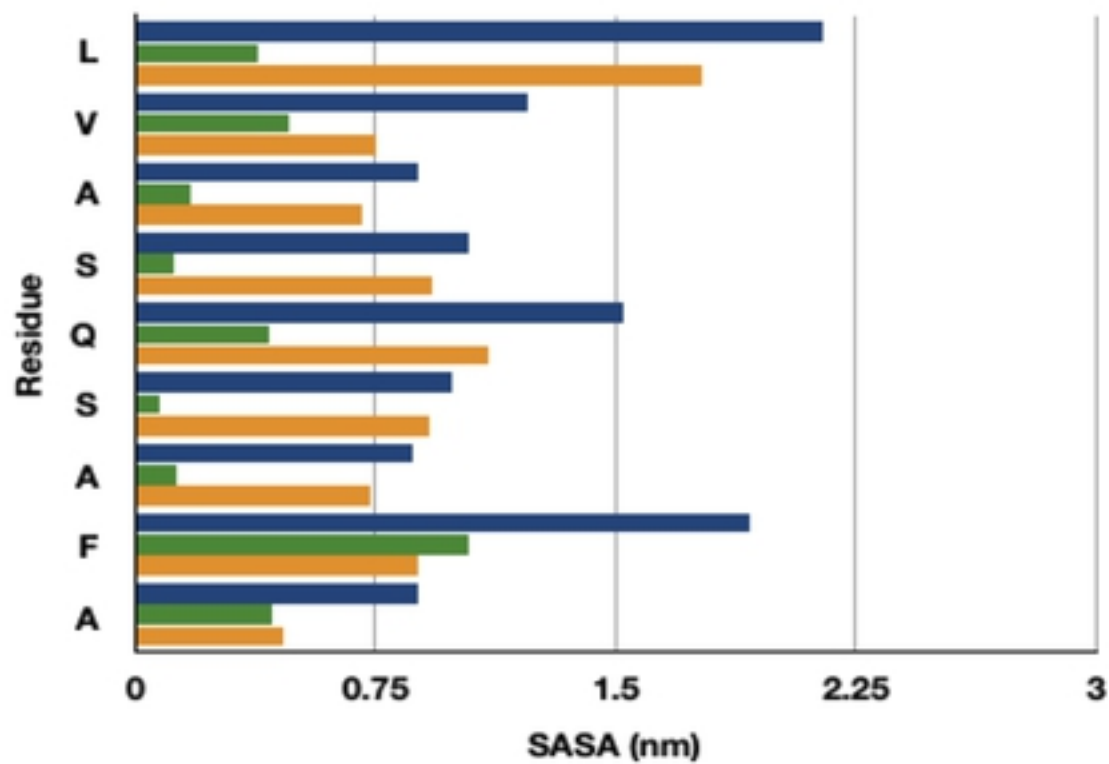

## B. G2

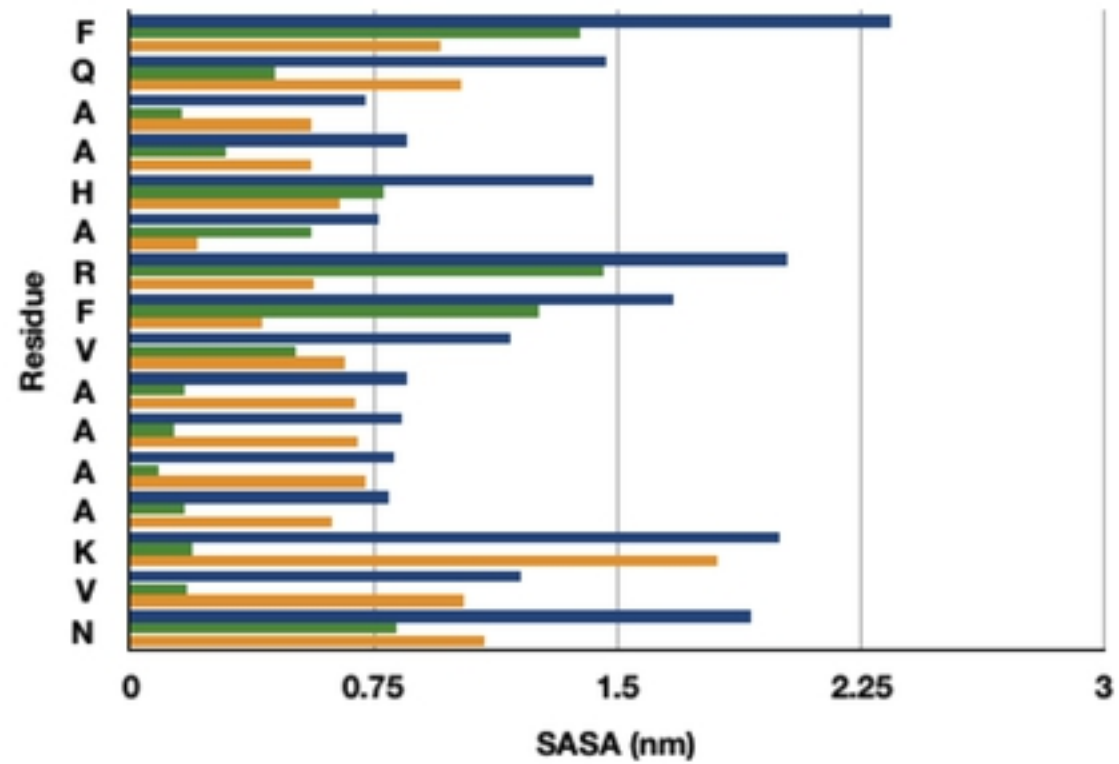

## C. H1

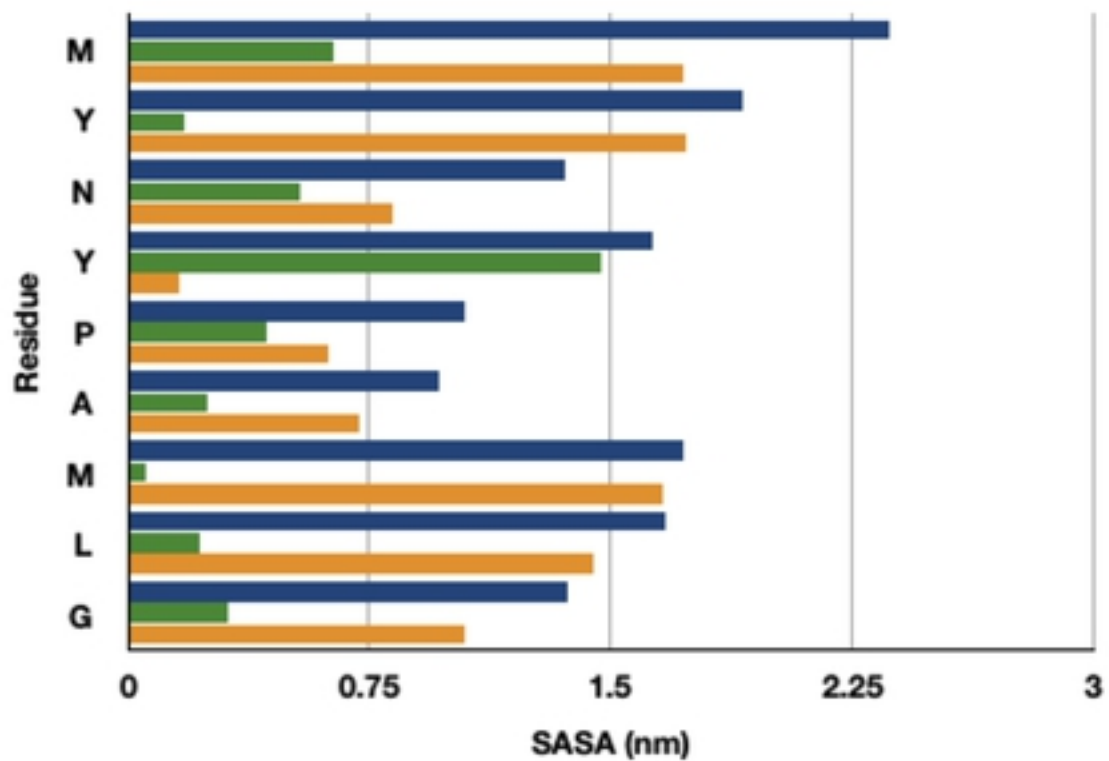

## D. H2

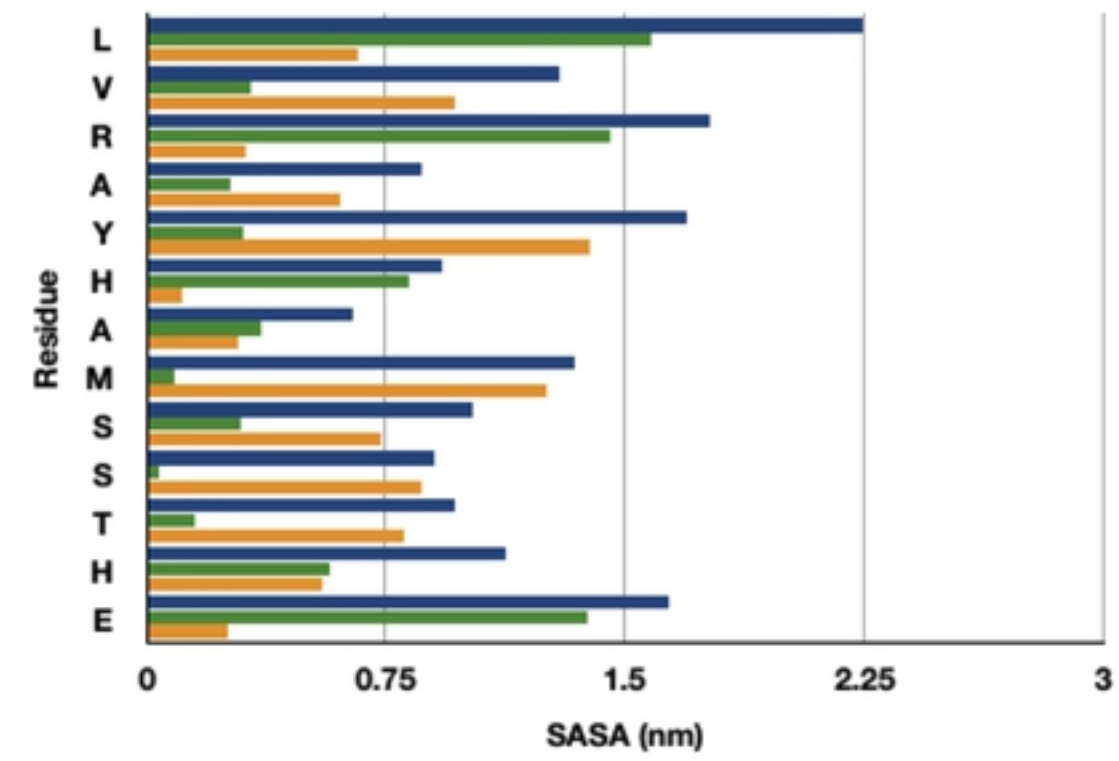

■ SASA (nm) epitope in solution  
■ SASA (nm) epitope in MHC  
■ ΔSASA (nm)

Figure6

**A. Cleft 0 ns - 310 K**

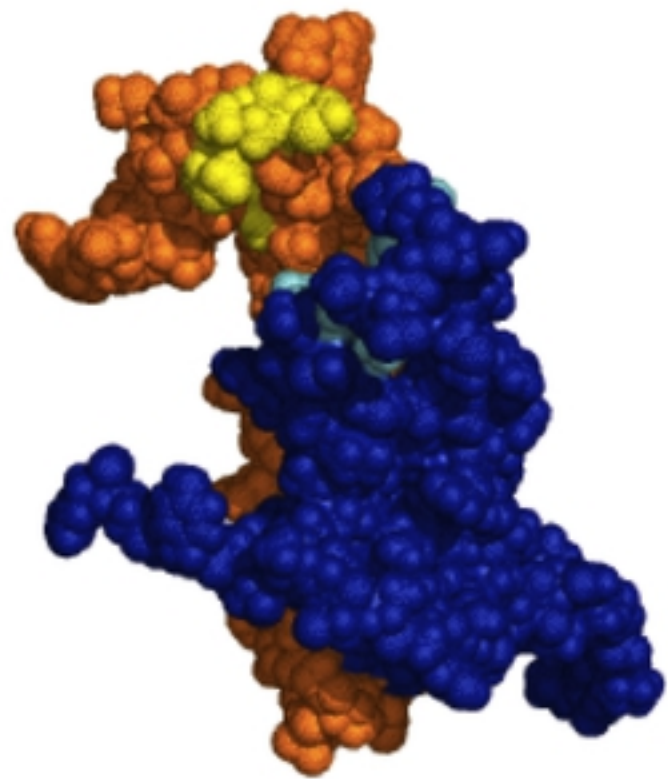

**B. Cleft 149 ns - 310 K**

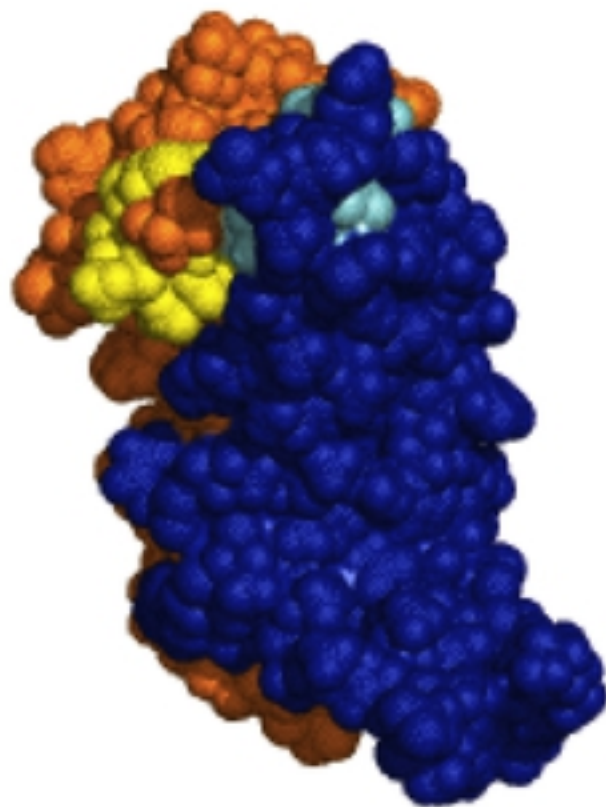

**C. Cleft 500 ns - 310 K**

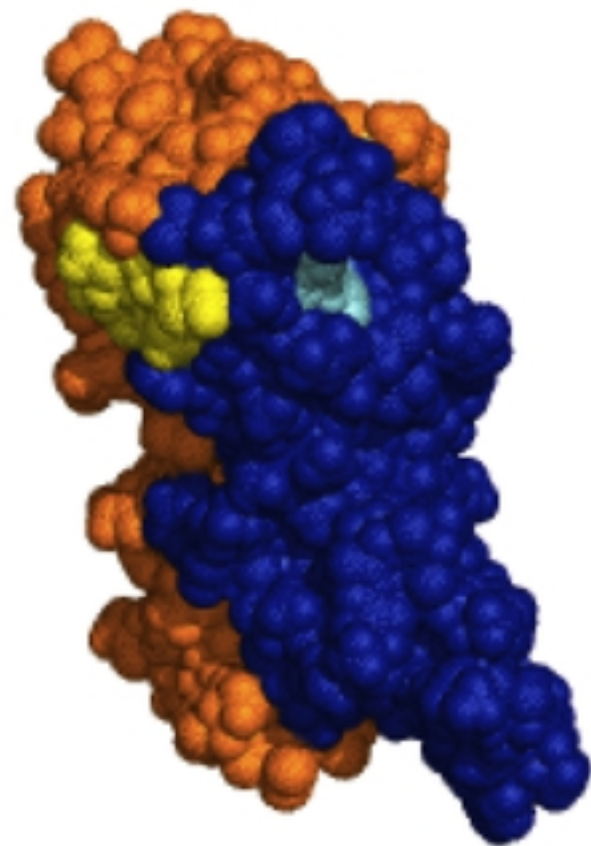

Figure7
